# Supplementary material for: Single-molecule detection of deoxyribonucleoside triphosphates in microdroplets
Source: PubMed Central journal article supplement — Nucleic Acids Res. 2019 Jul 18;47(17):e101. doi: 10.1093/nar/gkz611 (PMC6753480; doi:10.1093/nar/gkz611), 2019-07-18
Supplement: gkz611_supplemental_file.pdf [file gkz611_supplemental_file.pdf]

# Supplementary Information

## Single-Molecule Detection of Deoxyribonucleoside Triphosphates in Microdroplets

*Boris Breiner, Kerr Johnson, Magdalena Stolarek, Ana-Luisa Silva, Aurel Negrea, Neil M. Bell, Tom H. Isaac, Mark Dethlefsen, Jasmin Chana, Lindsey A. Ibbotson, Rebecca N. Palmer, James Bush, Alexander J. Dunning, David M. Love, Olympia Pachoumi, Douglas J. Kelly, Aya Shibahara, Mei Wu, Maciej Sosna, Paul H. Dear, Fabian Tolle, Edoardo Petrini, Michele Amasio, Leigh R. Shelford, Monica S. Saavedra, Eoin Sheridan, Jekaterina Kuleshova, Gareth J. Podd, Barnaby W. Balmforth, and Cameron A. Frayling*

Base 4 Innovation Ltd, Broers Building, J.J Thomson Avenue, Cambridge CB3 0FA, UK.

## Table of Contents

|                                                                                                 |           |
|-------------------------------------------------------------------------------------------------|-----------|
| <b>TABLE OF CONTENTS .....</b>                                                                  | <b>2</b>  |
| <b>MATERIALS AND EQUIPMENT .....</b>                                                            | <b>3</b>  |
| <b>TYPICAL DETECTION REACTION AND TIME-COURSE – BULK SOLUTION.....</b>                          | <b>4</b>  |
| <b>FLUORESCENCE MEASUREMENTS AND DATA ANALYSIS – BULK SOLUTION .....</b>                        | <b>5</b>  |
| A.    FLUORESCENT INTENSITY MEASUREMENTS OF THE FOUR COLOR DETECTION REACTION .....             | 5         |
| B.    CALCULATION OF THE FLUORESCENT INTENSITY SIGNAL .....                                     | 5         |
| C.    RATIO OF THE FLUORESCENT INTENSITY SIGNAL OVER BACKGROUND.....                            | 5         |
| D.    DIGESTION OF THE OLIGO MIX WITH EXONUCLEASE T AND EXONUCLEASE I .....                     | 6         |
| <b>DNA OLIGOS - DESIGN AND SEQUENCES.....</b>                                                   | <b>7</b>  |
| <b>CHOICE OF DYES .....</b>                                                                     | <b>9</b>  |
| <b>PREPARATION OF THE 100X OLIGO MIX.....</b>                                                   | <b>10</b> |
| <b>OPTIMISATION OF THE BUFFER USED IN THE DETECTION REACTION .....</b>                          | <b>11</b> |
| A.    TITRATION OF TRIS-HCL, pH 7.6 VS. KCL AT 5 mM MgCl <sub>2</sub> .....                     | 11        |
| B.    TITRATION OF TRIS-HCL, pH 7.6 VS. MgCl <sub>2</sub> AT 20 mM KCL .....                    | 12        |
| <b>OPTIMISATION OF SPERMINE, SPERMIDINE AND TEPA ADDITIVES.....</b>                             | <b>14</b> |
| A.    TITRATION OF SPERMINE VS. TEPA AT 1.0 mM SPERMIDINE .....                                 | 14        |
| B.    TITRATION OF SPERMINE VS. TEPA AT 1.5 mM SPERMIDINE .....                                 | 15        |
| C.    TITRATION OF SPERMINE VS TEPA AT 2.0 mM SPERMIDINE .....                                  | 16        |
| <b>SCREENING OF CAPTURE POLYMERASE AND LIGATION ENZYME .....</b>                                | <b>17</b> |
| A.    SCREENING OF CAPTURE POLYMERASE – PART 1 .....                                            | 18        |
| B.    SCREENING OF CAPTURE POLYMERASE – PART 2 .....                                            | 19        |
| C.    SCREENING OF LIGATION ENZYME.....                                                         | 20        |
| <b>DIGESTION OF OLIGO MIX USING THE EXONUCLEASE ACTIVITY OF DIFFERENT<br/>POLYMERASES .....</b> | <b>21</b> |
| A.    POLYMERASE - REQUIRED BUFFERS AND TEMPERATURES .....                                      | 21        |
| B.    SCREENING OF DIFFERENT POLYMERASES.....                                                   | 22        |
| C.    DIGESTION TEMPERATURE FOR <i>Pfu</i> ULTRA II FUSION HS DNA POLYMERASE .....              | 23        |
| <b>CHOICE OF PROTECTING GROUP ON LIG .....</b>                                                  | <b>24</b> |
| <b>SPECIFICITY OF DETECTION .....</b>                                                           | <b>25</b> |
| <b>FLUORESCENCE MEASUREMENTS OF DROPLETS.....</b>                                               | <b>26</b> |
| A.    EXAMPLE IMAGES – ALL COLOR CHANNELS .....                                                 | 27        |
| B.    FLUORESCENCE INTENSITY VS. DROPLET DIAMETER – ALL COLOR CHANNELS .....                    | 28        |
| C.    FLUORESCENCE INTENSITY HISTOGRAMS – ALL COLOR CHANNELS .....                              | 29        |
| D.    FLUORESCENCE INTENSITY – CHANNEL CORRELATIONS (3 - 7 MICROMETER DIAMETERS) .....          | 30        |
| E.    FLUORESCENCE INTENSITY – CHANNEL CORRELATIONS (3 - 4 MICROMETER DIAMETERS).....           | 31        |
| <b>DROPLET FINDING ALGORITHM .....</b>                                                          | <b>32</b> |
| <b>REFERENCES.....</b>                                                                          | <b>32</b> |

## **Materials and Equipment**

Dye-labelled DNA oligos were purchased from ATDbio (Southampton, UK), All other oligos were purchased from Integrated DNA Technologies (Coralville, IA, USA). We use PAGE purified Probe oligos and double HPLC purified Capture and Ligation oligos.

Enzymes were purchased from New England Biolabs (Ipswich, MA, USA), Qiagen Beverly (Enzymatics) (Beverly, MA, USA) or Agilent (Santa Clara, CA, USA).

Spermine was purchased from Abcam (Cambridge, UK), Tetraethylenepentamine (TEPA; Acros, technical. grade) and Ambion nuclease-free water was purchased from Fisher Scientific (Waltham, MA, USA), and the latter was used throughout. All other reagents were purchased from Sigma (St. Louis, MO, USA) at the highest purity available, unless otherwise noted.

384-well PS Microplate were purchased from Greiner Bio-one (Frickenhausen, Germany; REF 784076).

## Typical Detection Reaction and Time-Course – Bulk Solution

In a typical, four-color 70  $\mu\text{L}$  (1x) or 175  $\mu\text{L}$  (2.5x) detection reaction, the following reagents were combined in a 1.5 mL tube.

**Supplementary Table 1:** Composition of a typical 70  $\mu\text{L}$  (1x) or 175  $\mu\text{L}$  (2.5x) four-color detection reaction.

| Component                    | Stock Concentration | Final Concentration | Volume ( $\mu\text{L}$ ) 1x | Volume ( $\mu\text{L}$ ) 2.5x |
|------------------------------|---------------------|---------------------|-----------------------------|-------------------------------|
| Water                        | -                   | -                   | 39.695                      | 99.238                        |
| Buffer <sup>1</sup>          | 5x                  | 1x                  | 14                          | 35                            |
| TIPP                         | 2,000 U/mL          | 66.6 U/mL           | 2.33                        | 5.825                         |
| TEPA                         | 0.3%                | 0.015%              | 3.5                         | 8.75                          |
| Spermine                     | 100 mM              | 1 mM                | 0.7                         | 1.75                          |
| Spermidine                   | 100 mM              | 1 mM                | 0.7                         | 1.75                          |
| Oligo mix <sup>2</sup>       | 100x                | 1x                  | 0.7                         | 1.75                          |
| <i>PfuUltra II Fusion HS</i> | 100 Reactions/mL    | 1.43 Reaction/mL    | 1                           | 2.5                           |
| <i>Bst</i> L.F. DNA pol.     | 8,000 U/mL          | 28.57 U/mL          | 0.25                        | 0.625                         |
| <i>E. coli</i> ligase        | 10,000 U/mL         | 17.85 U/mL          | 0.125                       | 0.3125                        |
| <b>Total</b>                 | -                   | -                   | 63                          | 157.5                         |

<sup>1</sup> see Supplementary Table 8 for further information on the buffer composition

<sup>2</sup> see Supplementary Table 7 for further information on the Oligo Mix

From the 2.5x volume mix, two samples of 63  $\mu\text{L}$  were taken and added to either 7  $\mu\text{L}$  of 250 pM dNTP or 7  $\mu\text{L}$  of water, to give the 25 pM and 0 pM samples, respectively. Each sample (25 pM or 0 pM) was split into five reactions by adding 14  $\mu\text{L}$  of each sample into 5 separate PCR tubes. The five tubes (for each sample), were incubated in a PCR thermocycler for the required amount of time (Supplementary Table 2).

**Supplementary Table 2:** Description of the time-course used in typical, four-color detection reaction.

The thermocycler program is 10 min @ 37 °C, followed by 90 min @ 69.5 °C.

| Tube | Sample       | Time Point (min) | Temperature (°C) |
|------|--------------|------------------|------------------|
| 1    | 25 pM & 0 pM | 0                | RT               |
| 2    | 25 pM & 0 pM | 10               | 37               |
| 3    | 25 pM & 0 pM | 40               | 69.5             |
| 4    | 25 pM & 0 pM | 70               | 69.5             |
| 5    | 25 pM & 0 pM | 100              | 69.5             |

## Fluorescence Measurements and Data Analysis – Bulk solution

### a. Fluorescent Intensity Measurements of the four color detection reaction

Fluorescence measurements (Fluorescence Intensity = FI) were performed on a Clariostar Plate Reader (BMG LABTECH GmbH, Ortenberg, Germany). The four colors (532 nm, 594 nm, 655 nm, 700 nm) are defined below (Supplementary Table 3).

**Supplementary Table 3:** Definition of the four colors measured by the Clariostar fluorescent plate reader.

| Color  | Excitation (nm) | Dichroic (nm) | Emission (nm) | Gain |
|--------|-----------------|---------------|---------------|------|
| 700 nm | 705-10          | 722.5         | 785-100       | 2450 |
| 655 nm | 643-20          | 665.2         | 690-25        | 2030 |
| 594 nm | 580-15          | 603.0         | 647-57        | 1707 |
| 532 nm | 530-12          | 548.5         | 570-18        | 1663 |

Prior to reading, samples of 10.5  $\mu\text{L}$  were plated onto a 384-well PS Microplate (Greiner Bio-one, Frickenhausen, Germany; 784076). Water was used on the 384 well plate as a blank reference for background correction.

### b. Calculation of the Fluorescent Intensity Signal

$$S = FI_{i(25 \text{ pM})} - FI_{i(0 \text{ pM})}$$

Where:-

S = Signal

$FI_{i(25 \text{ pM})}$  = Fluorescent Intensity for the 25 pM sample at time i

$FI_{i(0 \text{ pM})}$  = Fluorescent Intensity for the 0 pM sample at time i

### c. Ratio of the Fluorescent Intensity Signal over background

$$R = \frac{FI_{i(25 \text{ pM})} - FI_{i(0 \text{ pM})}}{FI_{i(0 \text{ pM})} - \frac{(FI_{0(25 \text{ pM})} + FI_{0(0 \text{ pM})})}{2}}$$

Where:-

R = Ratio

$FI_{i(25 \text{ pM})}$  = Fluorescent Intensity for the 25 pM sample at time i

$FI_{i(0 \text{ pM})}$  = Fluorescent Intensity for the 0 pM sample at time i

$FI_{0(25 \text{ pM})}$  = Fluorescent Intensity for the 25 pM sample at 0 min

$FI_{0(0 \text{ pM})}$  = Fluorescent Intensity for the 0 pM sample at 0 min

#### d. Digestion of the Oligo Mix with Exonuclease T and Exonuclease I

To ascertain the maximum amount of signal that can be generated from the labelled probes within a standard reaction mix, the Oligo Mix was digested using Exonuclease T and Exonuclease I (Supplementary Table 4 & 5).

**Supplementary Table 4:** Reaction mixture for the digestion of the Oligo Mix with Exonuclease T and Exonuclease I, reactions were incubated at 37 °C for 30 mins.

| Component              | Stock Concentration | Volume (µL) |
|------------------------|---------------------|-------------|
| Water                  | -                   | 53.3        |
| Buffer <sup>1</sup>    | 5x                  | 14          |
| Oligo mix <sup>2</sup> | 100x                | 0.7         |
| Exonuclease T          | 5,000 U/mL          | 1           |
| Exonuclease I          | 20,000 U/mL         | 1           |

<sup>1</sup> see Supplementary Table 8 for further information on the buffer composition

<sup>2</sup> see Supplementary Table 7 for further information on the Oligo Mix

**Supplementary Table 5:** The maximum fluorescent intensity that can be obtained from the four labelled Probe oligos (700 nm, 655 nm, 594 nm and 532 nm) after digestion of the Oligo Mix with Exonuclease T and Exonuclease I.

| Digestion   | 700 nm | 655 nm | 594 nm | 532 nm |
|-------------|--------|--------|--------|--------|
| Exo T/Exo I | 166960 | 165572 | 111612 | 191448 |
| PFu UF      | 70808  | 52271  | 38205  | 41887  |
| % Digested  | 42.4   | 31.6   | 34.2   | 21.9   |

## DNA Oligos - Design and Sequences

Nomenclature for non-standard bases and modifications: -

F = dT with corresponding fluorophore attached

Q = dT with corresponding fluorescence quencher attached

/3C6/ = 3'-terminal hexanediol spacer

\* = phosphorothioate linker

/5Phos/ = 5'-terminal phosphate group

/3InvdT/ = 3'-terminal 3'-5'-inverted deoxythymidine base

Black Hole Quencher 1 (BHQ1) was incorporated into the oligos using BHQ-1-dT-CE Phosphoramidite. Black Hole Quencher 2 (BHQ2) was incorporated into the oligos using BHQ-2-dT-CE Phosphoramidite and ATTO dyes were incorporated onto an amino modifier C6 dT-phosphoramidite post-synthesis (Supplementary Table 6).

**Supplementary Table 6:** Description of the Probe, Ligation, Capture, Captured and Target oligos used.

| Oligo | Color | Sequence                                                      | F/Q                      |
|-------|-------|---------------------------------------------------------------|--------------------------|
| Probe | 700   | 5' -<br>CAAGTGACTCGGTCCAGGGCCAGFFQATTTTCAGCACA<br>TA-3'       | F = ATTO 700<br>Q = BHQ2 |
|       | 655   | 5' -<br>TCGTGCCTCATCGAACTGACGAGGFFQFFGGTTTGTG<br>GT/3C6/-3'   | F = ATTO 655<br>Q = BHQ2 |
|       | 594   | 5' -<br>CTCCAACGGACCCTAACGCACTGGAFFQCTTATGTATT<br>GT-3'       | F = ATTO 594<br>Q = BHQ2 |
|       | 532   | 5' -<br>TCACTCATGGAACATCACTCCTCCGFFQTTTCCTTTCCA<br>GA/3C6/-3' | F = ATTO 532<br>Q = BHQ1 |
| LIG   | 700   | 5' -<br>/5Phos/GGACCGAGTCAGAACTAGATGTAGG/3InvdT/-3            |                          |
|       | 655   | 5' -<br>/5Phos/GTTTCGATGAGGCACGTCTTAGATGTACG/3<br>InvdT/-3'   |                          |
|       | 594   | 5' -<br>/5Phos/GTTAGGGTCCGTTGGAGCTTAGATGTACG/3<br>InvdT/-3'   |                          |
|       | 532   | 5' -<br>/5Phos/TGATGTTCCATGAGTGTCTTAGATGTACG/3<br>InvdT/-3'   |                          |
| CAP   | 700   | 5' -TCCGTGAGTAATGTGGTAAAATAAACTGGGCC*C-<br>3'                 |                          |
|       | 655   | 5' -TCGCTGAGCCTCCACAAACCAATAACCTCGT*C-<br>3'                  |                          |
|       | 594   | 5' -TCGCTGAGCCTCAATACATAAGAAATCCAGT*G-<br>3'                  |                          |

|                 |            |                                                                                        |  |
|-----------------|------------|----------------------------------------------------------------------------------------|--|
|                 | <b>532</b> | 5' -TCGCTGAGCCACTGGAAAGGAAAAACGGAGG*A-<br>3'                                           |  |
| <b>Captured</b> | <b>700</b> | 5' -<br>TCCGTGAGTAATGTGGTCAAATAAACTGGGCC*CT-3'                                         |  |
|                 | <b>655</b> | 5' -TCGCTGAGCCTCCACAAACCAATAACCTCGT*CA-<br>3'                                          |  |
|                 | <b>594</b> | 5' -TCGCTGAGCCTCAATACATAAGAAATCCAGT*GC-<br>3'                                          |  |
|                 | <b>532</b> | 5' -TCGCTGAGCCACTGGAAAGGAAAAACGGAGG*AG-<br>3'                                          |  |
| <b>Target</b>   | <b>700</b> | 5' -<br>TCCGTGAGTAATGTGGTCAAATAAACTGGGCC*CTGGA<br>CCGAGTCTTAACTAGATGTAGG/3InvdT/-3'    |  |
|                 | <b>655</b> | 5' -<br>TCGCTGAGCCTCCACAAACCAATAACCTCT*CAGTTTC<br>GATGAGGCACGTCTTAGATGTACG/3InvdT/-3'  |  |
|                 | <b>594</b> | 5' -<br>TCGCTGAGCCTCAATACATAAGAAATCCAGT*GCGTTA<br>GGGTCCGTTGGAGCTTAGATGTACG/3InvdT/-3' |  |
|                 | <b>532</b> | 5' -<br>TCGCTGAGCCACTGGAAAGGAAAAACGGAGG*AGTGAT<br>GTTCCATGAGTGTCTTAGATGTACG/3InvdT/-3' |  |



## Choice of Dyes

Dyes were chosen for their photostability, solubility in aqueous media, and, most importantly, compatibility with our enzymes. Multiplexing the fluorophores is achieved by matching the dye excitation wavelengths to laser lines at 532 nm (ATTO 532), 594 nm (ATTO 594), 640 nm (ATTO 655), and 701 nm (ATTO 700). We found ATTO 700 to be superior, with respect to enzymatic compatibility, to the ATTO 488 and other dyes of similar spectral properties that are traditionally used in multiplexing applications.(1, 2) Use of the shorter wavelength dyes resulted in very high false signal due to unusually rapid single-strand digestion by the exonuclease. The dyes were attached to the Probe Oligo using standard postsynthetic protocols (-NH<sub>2</sub> – NHS-ester amide chemistry(3)). As quenchers, we found that the quenchers BHQ-1 (for ATTO 532) and BHQ-2 (for ATTO 594, 655 and 700) provided >99% quenching efficiency, thereby guaranteeing a large difference between quenched and unquenched states(4). The quenchers were attached during the solid-state DNA oligo synthesis by using the corresponding quencher-labelled phosphoramidites.

## Preparation of the 100x Oligo Mix

For ease of use, all the Probe, Ligation and Capture oligos were pre-mixed, in nuclease-free water, at a 100 times the required final concentration; before addition (of the oligo mix) to the detection reaction (Supplementary Table 7).

**Supplementary Table 7:** Description of the Probe, Ligation and Capture oligos used for the 100x Oligo Mix.

| <b>Oligo</b>         | <b>100x Oligo Mix (nM)</b> | <b>Final Oligo Concentration (nM)</b> |
|----------------------|----------------------------|---------------------------------------|
| <b>Probe, 700 nm</b> | 600                        | 6                                     |
| <b>Probe, 655 nm</b> | 600                        | 6                                     |
| <b>Probe, 594 nm</b> | 600                        | 6                                     |
| <b>Probe, 532 nm</b> | 1000                       | 10                                    |
| <b>LIG, 700 nm</b>   | 4000                       | 40                                    |
| <b>LIG, 655 nm</b>   | 100                        | 10                                    |
| <b>LIG, 594 nm</b>   | 1000                       | 10                                    |
| <b>LIG, 532 nm</b>   | 2000                       | 20                                    |
| <b>CAP, 700 nm</b>   | 50                         | 0.5                                   |
| <b>CAP, 655 nm</b>   | 50                         | 0.5                                   |
| <b>CAP, 594 nm</b>   | 50                         | 0.5                                   |
| <b>CAP, 532 nm</b>   | 50                         | 0.5                                   |

## Optimisation of the Buffer used in the Detection Reaction

The reaction buffer had to be chosen in a way that would allow all enzymes to work in the same environment. We found that the limiting factor in buffer optimization was *PfuUltra II Fusion HS DNA polymerase*, with respect to the specificity of its dsDNA exonuclease-activity. Both *Bst* L.F. DNA polymerase and *E. coli* DNA ligase tolerated a much wider range of buffer conditions. While these two enzymes did not work in the proprietary buffer supplied with *PfuUltra II Fusion HS DNA polymerase*, it was found that using a modified version of this buffer made it possible to have all enzymes work in the same buffer (Supplementary Table 8). Optimisation of the Tris-HCl, KCl and MgCl<sub>2</sub> components of the buffer are described below (Supplementary Figures 1 and 2).

**Supplementary Table 8:** Final Concentration of the components that make up the 1x buffer used in a typical, four-color detection reaction.

| Component         | Concentration in 1x buffer | Concentration in 5x buffer stock |
|-------------------|----------------------------|----------------------------------|
| Tris-HCl, pH 7.6  | 12 mM                      | 60 mM                            |
| MgCl <sub>2</sub> | 5 mM                       | 25 mM                            |
| KCl               | 20 mM                      | 100 mM                           |
| Triton X-100      | 0.1%                       | 0.5%                             |
| DTT               | 0.5 mM                     | 2.5 mM                           |
| NAD               | 400 nM                     | 2 μM                             |

### a. Titration of Tris-HCl, pH 7.6 vs. KCl at 5 mM MgCl<sub>2</sub>

To optimise the Tris-HCl, pH 7.6 and KCl concentrations a cross-titration experiment was performed, leaving the MgCl<sub>2</sub> concentration at 5 mM. The cross-titration showed that concentrations of 12 mM Tris-HCl and 20 mM KCl provided a good operating window for the reaction, which could accommodate slight increases and decreases in salt concentration without adversely affecting the performance of the detection reaction (Supplementary Figure 1). Accommodation of additional salts is desirable as it allows for some tolerance to water loss from microdroplets.

| Signal (700 Channel) |    | Tris-HCl, pH 7.6 (mM) |       |       |       |       |      |
|----------------------|----|-----------------------|-------|-------|-------|-------|------|
|                      |    | 48                    | 36    | 24    | 12    | 6     | 3    |
| KCl (mM)             | 40 | 5596                  | 8380  | 14838 | 38219 | 17597 | 446  |
|                      | 35 | 7673                  | 8087  | 17488 | 42525 | 14658 | 2341 |
|                      | 30 | 7721                  | 10733 | 24115 | 44442 | 16832 | 6813 |
|                      | 25 | 10606                 | 20919 | 26178 | 49164 | 20431 | 4806 |
|                      | 20 | 9384                  | 19681 | 27819 | 54010 | 23243 | 4984 |
|                      | 15 | 12456                 | 18545 | 31519 | 56013 | 28764 | 7310 |
|                      | 10 | 8447                  | 16186 | 28209 | 28075 | 29688 | 9857 |
|                      | 5  | 4333                  | 10343 | 21737 | 52902 | 34484 | 8319 |

| Signal (655 Channel) |    | Tris-HCl, pH 7.6 (mM) |      |       |       |       |       |
|----------------------|----|-----------------------|------|-------|-------|-------|-------|
|                      |    | 48                    | 36   | 24    | 12    | 6     | 3     |
| KCl (mM)             | 40 | 1450                  | 2829 | 9387  | 63752 | 17023 | 71    |
|                      | 35 | 1893                  | 2756 | 11461 | 70824 | 16279 | 68    |
|                      | 30 | 1793                  | 3658 | 18750 | 71977 | 20816 | 2558  |
|                      | 25 | 2326                  | 8591 | 22197 | 78985 | 32061 | 709   |
|                      | 20 | 2122                  | 5592 | 23435 | 80342 | 43824 | 603   |
|                      | 15 | 2626                  | 5815 | 22352 | 81812 | 50957 | 1208  |
|                      | 10 | 1292                  | 4200 | 15183 | 25551 | 55942 | 2138  |
|                      | 5  | 416                   | 1602 | 8435  | 79244 | 55666 | -4097 |

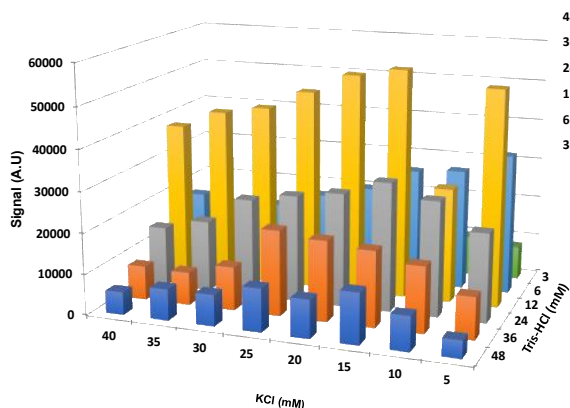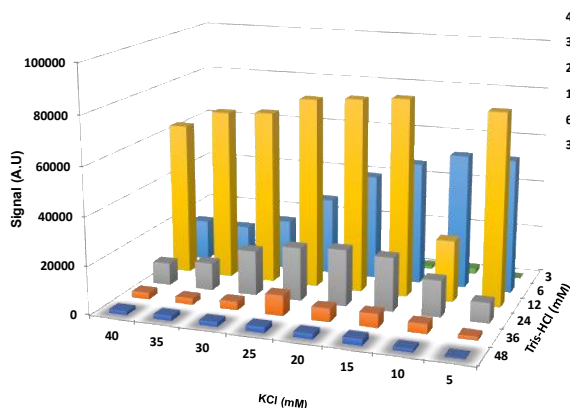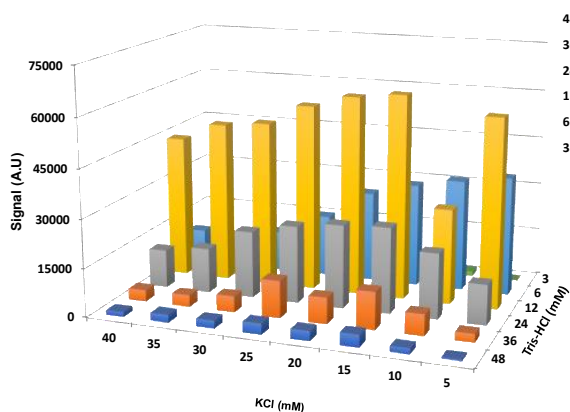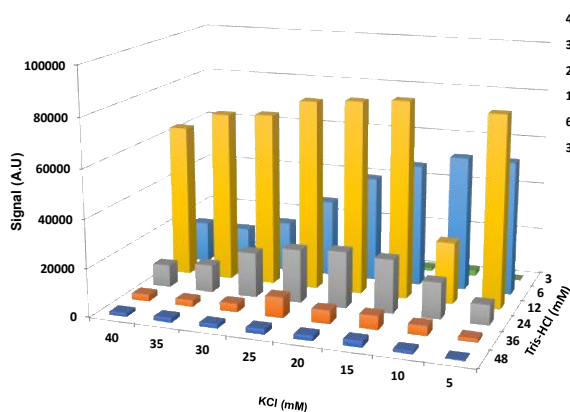

| Signal (594 Channel) |    | Tris-HCl, pH 7.6 (mM) |       |       |       |       |        |
|----------------------|----|-----------------------|-------|-------|-------|-------|--------|
|                      |    | 48                    | 36    | 24    | 12    | 6     | 3      |
| KCl (mM)             | 40 | 1493                  | 3593  | 11917 | 44321 | 10327 | 121    |
|                      | 35 | 2458                  | 3727  | 13883 | 49871 | 9620  | 80     |
|                      | 30 | 2479                  | 5092  | 20762 | 51305 | 12493 | 1532   |
|                      | 25 | 3463                  | 11537 | 23945 | 57773 | 19233 | 329    |
|                      | 20 | 3065                  | 8123  | 25770 | 61556 | 28174 | 506    |
|                      | 15 | 3873                  | 11600 | 26509 | 63164 | 32059 | 745    |
|                      | 10 | 1839                  | 6696  | 20284 | 29457 | 34644 | 1348   |
|                      | 5  | 522                   | 2670  | 12442 | 58521 | 36896 | -25136 |

| Signal (532 Channel) |    | Tris-HCl, pH 7.6 (mM) |       |       |        |       |        |
|----------------------|----|-----------------------|-------|-------|--------|-------|--------|
|                      |    | 48                    | 36    | 24    | 12     | 6     | 3      |
| KCl (mM)             | 40 | 888                   | 1347  | 7373  | 70962  | 25197 | 384    |
|                      | 35 | 623                   | 735   | 8378  | 80093  | 23383 | 104    |
|                      | 30 | 553                   | 731   | 15090 | 85830  | 30135 | 5366   |
|                      | 25 | 656                   | 3213  | 18570 | 102300 | 43890 | 1291   |
|                      | 20 | 15                    | 1494  | 19990 | 110125 | 57950 | 1780   |
|                      | 15 | 223                   | 2837  | 18814 | 113412 | 65217 | 3263   |
|                      | 10 | 436                   | 1008  | 11987 | 35427  | 68051 | 6330   |
|                      | 5  | -95                   | 38632 | 6129  | 87224  | 65313 | -10012 |

**Supplementary Figure 1:** Cross-Titration of Tris-HCl, pH 7.6 vs. KCl, using 5 mM  $MgCl_2$ . Tris-HCl, pH 7.6 was titrated from 3 to 48 mM, while KCl was titrated from 5 to 40 mM using the four color standard reaction with 0 and 25 pM dNTPs. The fluorescent signal (25 pM dNTPs– 0 pM dNTPs) for the four colors is shown in the tables and plotted; 700 nm (top left), 655nm (top right), 594 nm (bottom left) and 532 nm (bottom right).

### b. Titration of Tris-HCl, pH 7.6 vs. $MgCl_2$ at 20 mM KCl

Following on from the KCl optimisation (Supplementary Figure 1), a cross-titration of Tris-HCl, pH 7.6 and  $MgCl_2$  was performed with a fixed KCl concentration of 20 mM. 12 mM Tris-HCl, pH 7.6 and 5 mM  $MgCl_2$  provided a good operating window for the reaction. Therefore,

12 mM Tris-HCl, pH 7.6, 5 mM MgCl<sub>2</sub> and 20 mM KCl were used as the final concentrations for the 1x buffer.

| Signal (700 Channel)   |        | Tris-HCl, pH 7.6 (mM) |      |       |       |       |       |
|------------------------|--------|-----------------------|------|-------|-------|-------|-------|
|                        |        | 48                    | 36   | 24    | 12    | 6     | 3     |
| MgCl <sub>2</sub> (mM) | 20     | 295                   | 1039 | 19007 | 29379 | 9046  | 237   |
|                        | 15     | 1249                  | 4371 | 42097 | 61091 | 40467 | 1655  |
|                        | 10     | 4529                  | 8355 | 68902 | 65543 | 64546 | 19140 |
|                        | 8      | 6867                  | 9487 | 80055 | 88639 | 69910 | 19167 |
|                        | 5      | 5704                  | 8578 | 86198 | 94672 | 67958 | 33123 |
|                        | 3      | 1347                  | 3670 | 52153 | 94780 | 72931 | 32297 |
|                        | 1.25   | 138                   | 1053 | 10484 | 69753 | 70101 | 20090 |
|                        | 0.6125 | -414                  | 204  | 1555  | 19493 | 65668 | 2335  |

| Signal (655 Channel)   |        | Tris-HCl, pH 7.6 (mM) |      |       |        |       |       |
|------------------------|--------|-----------------------|------|-------|--------|-------|-------|
|                        |        | 48                    | 36   | 24    | 12     | 6     | 3     |
| MgCl <sub>2</sub> (mM) | 20     | 137                   | 345  | 2802  | 4541   | 547   | -14   |
|                        | 15     | 91                    | 910  | 11634 | 34125  | 6010  | 122   |
|                        | 10     | 1001                  | 2797 | 47846 | 75778  | 58151 | 1374  |
|                        | 8      | 1723                  | 3820 | 79934 | 100088 | 83004 | 1264  |
|                        | 5      | 1118                  | 2957 | 90169 | 105536 | 86962 | 6592  |
|                        | 3      | 176                   | 581  | 15000 | 105898 | 93345 | 25445 |
|                        | 1.25   | -57                   | 133  | 1400  | 52610  | 82987 | 14848 |
|                        | 0.6125 | -187                  | 33   | 254   | 4477   | 76482 | 320   |

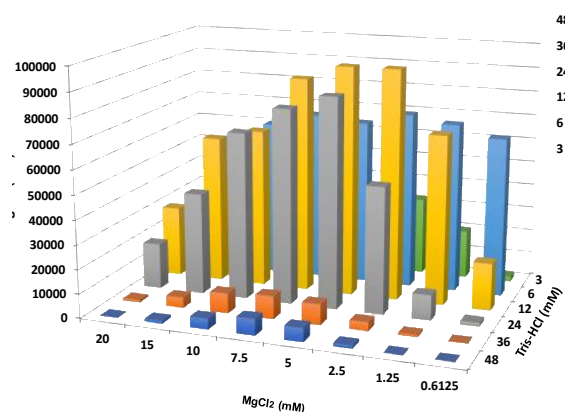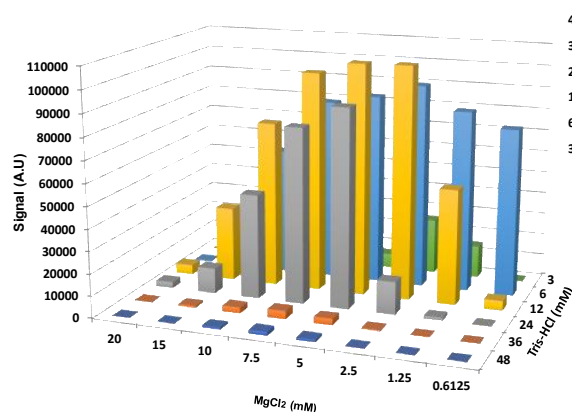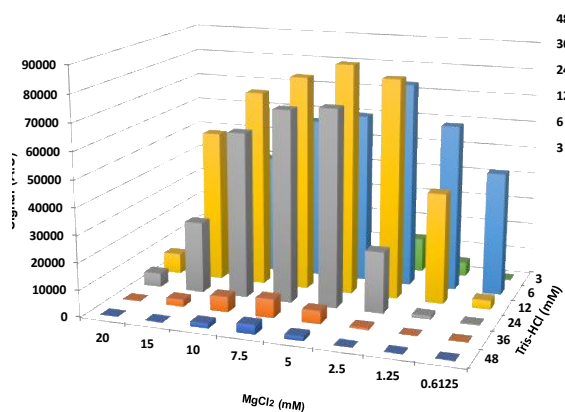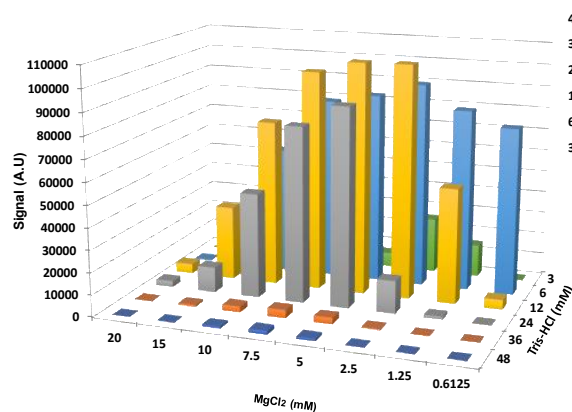

| Signal (594 Channel)   |        | Tris-HCl, pH 7.6 (mM) |      |       |       |       |       |
|------------------------|--------|-----------------------|------|-------|-------|-------|-------|
|                        |        | 48                    | 36   | 24    | 12    | 6     | 3     |
| MgCl <sub>2</sub> (mM) | 20     | 197                   | 331  | 5251  | 7784  | 234   | 137   |
|                        | 15     | 175                   | 2745 | 26640 | 56488 | 6053  | 217   |
|                        | 10     | 1882                  | 5847 | 61663 | 73105 | 44271 | 612   |
|                        | 8      | 3596                  | 7041 | 71330 | 79922 | 60190 | 633   |
|                        | 5      | 1687                  | 4857 | 72998 | 85563 | 63440 | 4576  |
|                        | 3      | -51                   | 788  | 22822 | 81431 | 76417 | 12832 |
|                        | 1.25   | -54                   | 24   | 1409  | 41167 | 62137 | 5217  |
|                        | 0.6125 | -522                  | 213  | 441   | 3400  | 45844 | 469   |

| Signal (532 Channel)   |        | Tris-HCl, pH 7.6 (mM) |      |        |        |        |       |
|------------------------|--------|-----------------------|------|--------|--------|--------|-------|
|                        |        | 48                    | 36   | 24     | 12     | 6      | 3     |
| MgCl <sub>2</sub> (mM) | 20     | 160                   | 302  | -67155 | 13192  | 525    | 156   |
|                        | 15     | -119                  | 1122 | 24037  | 108424 | 13203  | 418   |
|                        | 10     | 660                   | 3047 | 84597  | 117514 | 95877  | 1211  |
|                        | 8      | 1156                  | 4017 | 109785 | 166429 | 130208 | 1684  |
|                        | 5      | 359                   | 1920 | 107652 | 175157 | 138494 | 17174 |
|                        | 3      | -145                  | -34  | 7248   | 160655 | 155851 | 47503 |
|                        | 1.25   | -43                   | -141 | 433    | 47890  | 115409 | 29229 |
|                        | 0.6125 | -537                  | 226  | 217    | 1656   | 71684  | 3587  |

**Supplementary Figure 2:** Cross-Titration of Tris-HCl, pH 7.6 vs. MgCl<sub>2</sub>, using 20 mM KCl. Tris-HCl, pH 7.6 was titrated from 3 to 48 mM, while MgCl<sub>2</sub> was titrated from 0.6125 to 20 mM using the four color standard reaction with 0 and 25 pM dNTPs. The fluorescent signal (25 pM dNTPs– 0 pM dNTPs) for the four colors is shown in the tables and plotted; 700 nm (top left), 655nm (top right), 594 nm (bottom left) and 532 nm (bottom right).

## Optimisation of Spermine, Spermidine and TEPA Additives

Reaction additives spermine, spermidine and TEPA were found to enhance the detection reaction and in an identical way as to how the buffer was optimised, cross-titrations were used to optimise the concentrations of spermine, spermidine and TEPA in the detection reaction

### a. Titration of Spermine vs. TEPA at 1.0 mM Spermidine

| Signal (700 Channel) |       | Spermine (mM) |       |       |       |       |       |
|----------------------|-------|---------------|-------|-------|-------|-------|-------|
|                      |       | 1.25          | 1.00  | 0.75  | 0.50  | 0.25  | 0.00  |
| TEPA (%)             | 0.015 | 38419         | 51735 | 51883 | 43142 | 37226 | 30218 |
|                      | 0.010 | 50139         | 51231 | 54521 | 49478 | 44434 | 26312 |
|                      | 0.005 | 44445         | 44441 | 48544 | 36313 | 39221 | 17022 |
|                      | 0.000 | 44086         | 47806 | 45280 | 43781 | 34726 | 9740  |

| Signal (655 Channel) |       | Spermine (mM) |       |       |       |       |       |
|----------------------|-------|---------------|-------|-------|-------|-------|-------|
|                      |       | 1.25          | 1.00  | 0.75  | 0.50  | 0.25  | 0.00  |
| TEPA (%)             | 0.015 | 24079         | 37247 | 39447 | 33834 | 32593 | 30870 |
|                      | 0.010 | 33444         | 34335 | 42879 | 40517 | 42322 | 27203 |
|                      | 0.005 | 25240         | 28386 | 35677 | 27606 | 37014 | 16597 |
|                      | 0.000 | 23218         | 30346 | 31513 | 34790 | 30175 | 10387 |

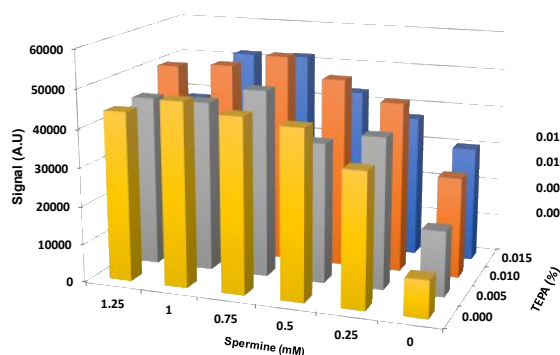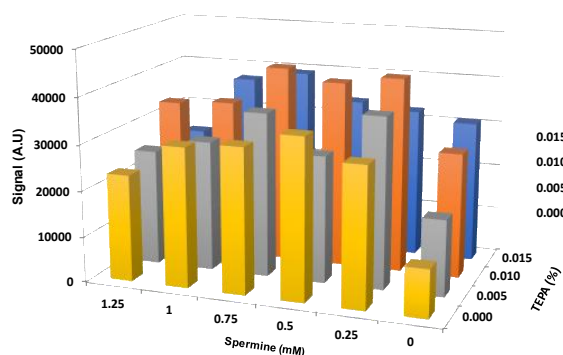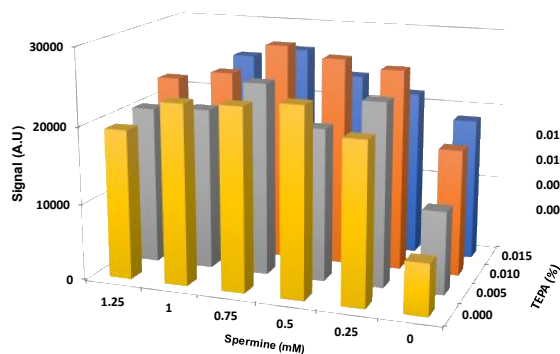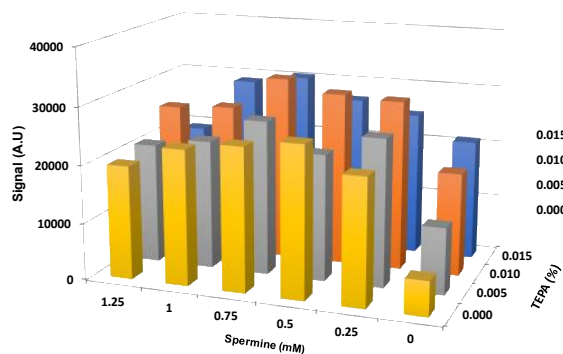

| Signal (594 Channel) |       | Spermine (mM) |       |       |       |       |       |
|----------------------|-------|---------------|-------|-------|-------|-------|-------|
|                      |       | 1.25          | 1.00  | 0.75  | 0.50  | 0.25  | 0.00  |
| TEPA (%)             | 0.015 | 16864         | 25363 | 26616 | 23533 | 21631 | 18605 |
|                      | 0.010 | 23143         | 24351 | 28443 | 27156 | 26211 | 16514 |
|                      | 0.005 | 20564         | 21002 | 24923 | 19784 | 23724 | 10733 |
|                      | 0.000 | 19473         | 23391 | 23631 | 24383 | 20861 | 6693  |

| Signal (532 Channel) |       | Spermine (mM) |       |       |       |       |       |
|----------------------|-------|---------------|-------|-------|-------|-------|-------|
|                      |       | 1.25          | 1.00  | 0.75  | 0.50  | 0.25  | 0.00  |
| TEPA (%)             | 0.015 | 19399         | 29009 | 30415 | 26993 | 25070 | 21013 |
|                      | 0.010 | 25626         | 26294 | 32092 | 30089 | 29574 | 17954 |
|                      | 0.005 | 20956         | 22462 | 26822 | 21990 | 25619 | 11597 |
|                      | 0.000 | 19801         | 23543 | 24952 | 26245 | 21941 | 6058  |

**Supplementary Figure 3:** Cross-Titration of Spermine vs. TEPA, using 1 mM Spermidine. Spermine was titrated from 0 to 1.25 mM, while TEPA was titrated from 0 – 0.015 % using the four color standard reaction with 0 and 25 pM dNTPs. The fluorescent signal (25 pM dNTPs– 0 pM dNTPs) for the four colors is shown in the tables and plotted; 700 nm (top left), 655nm (top right), 594 nm (bottom left) and 532 nm (bottom right).

## b. Titration of Spermine vs. TEPA at 1.5 mM Spermidine

| Signal (700 Channel) |       | Spermine (mM) |       |       |       |       |       |
|----------------------|-------|---------------|-------|-------|-------|-------|-------|
|                      |       | 1.25          | 1.00  | 0.75  | 0.50  | 0.25  | 0.00  |
| TEPA (%)             | 0.015 | 38419         | 51735 | 51883 | 43142 | 37226 | 30218 |
|                      | 0.010 | 50139         | 51231 | 54521 | 49478 | 44434 | 26312 |
|                      | 0.005 | 44445         | 44441 | 48544 | 36313 | 39221 | 17022 |
|                      | 0.000 | 44086         | 47806 | 45280 | 43781 | 34726 | 9740  |

| Signal (655 Channel) |       | Spermine (mM) |       |       |       |       |       |
|----------------------|-------|---------------|-------|-------|-------|-------|-------|
|                      |       | 1.25          | 1.00  | 0.75  | 0.50  | 0.25  | 0.00  |
| TEPA (%)             | 0.015 | 24079         | 37247 | 39447 | 33834 | 32593 | 30870 |
|                      | 0.010 | 33444         | 34335 | 42879 | 40517 | 42322 | 27203 |
|                      | 0.005 | 25240         | 28386 | 35677 | 27606 | 37014 | 16597 |
|                      | 0.000 | 23218         | 30346 | 31513 | 34790 | 30175 | 10387 |

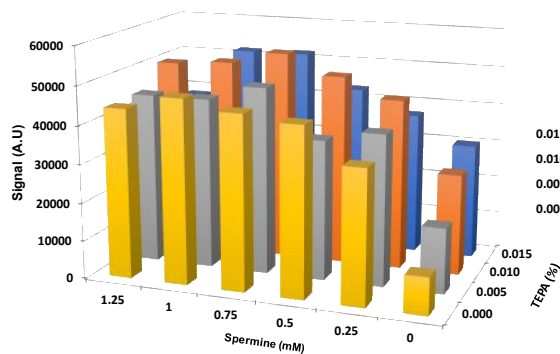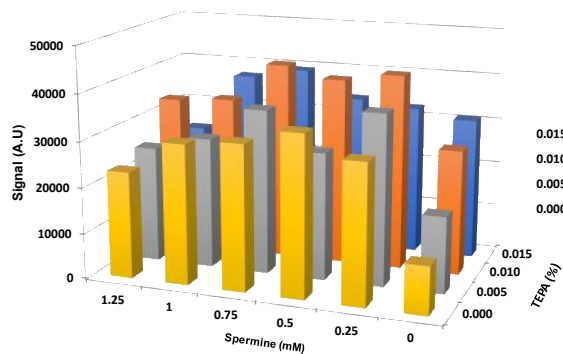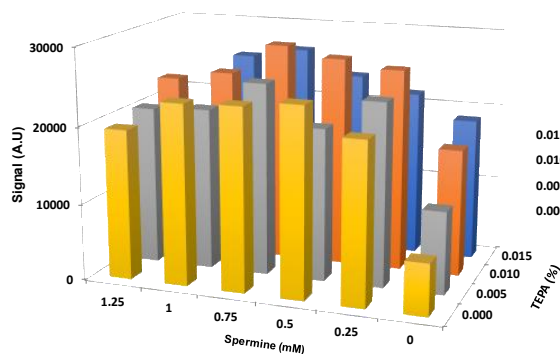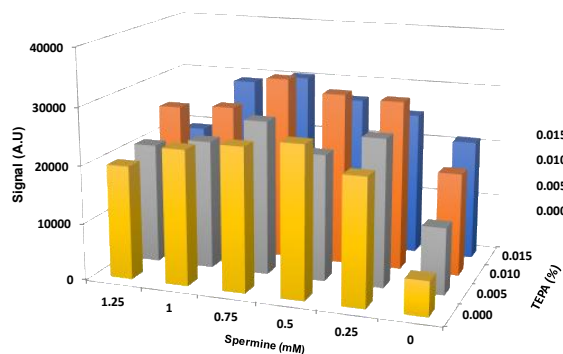

| Signal (594 Channel) |       | Spermine (mM) |       |       |       |       |       |
|----------------------|-------|---------------|-------|-------|-------|-------|-------|
|                      |       | 1.25          | 1.00  | 0.75  | 0.50  | 0.25  | 0.00  |
| TEPA (%)             | 0.015 | 16864         | 25363 | 26616 | 23533 | 21631 | 19605 |
|                      | 0.010 | 23143         | 24351 | 28443 | 27156 | 26211 | 16514 |
|                      | 0.005 | 20564         | 21002 | 24923 | 19784 | 23724 | 10733 |
|                      | 0.000 | 19473         | 23391 | 23631 | 24383 | 20861 | 6693  |

| Signal (532 Channel) |       | Spermine (mM) |       |       |       |       |       |
|----------------------|-------|---------------|-------|-------|-------|-------|-------|
|                      |       | 1.25          | 1.00  | 0.75  | 0.50  | 0.25  | 0.00  |
| TEPA (%)             | 0.015 | 19399         | 29009 | 30415 | 26993 | 25070 | 21013 |
|                      | 0.010 | 25626         | 26294 | 32092 | 30089 | 29574 | 17954 |
|                      | 0.005 | 20956         | 22462 | 26822 | 21990 | 25619 | 11597 |
|                      | 0.000 | 19801         | 23543 | 24952 | 26245 | 21941 | 6058  |

**Supplementary Figure 4:** Cross-Titration of Spermine vs. TEPA, using 1.5 mM Spermidine. Spermine was titrated from 0 to 1.25 mM, while TEPA was titrated from 0 – 0.015 % using the four color standard reaction with 0 and 25  $\mu$ M dNTPs. The fluorescent signal (25  $\mu$ M dNTPs– 0  $\mu$ M dNTPs) for the four colors is shown in the tables and plotted; 700 nm (top left), 655nm (top right), 594 nm (bottom left) and 532 nm (bottom right).

### c. Titration of Spermine vs TEPA at 2.0 mM Spermidine

| Signal (700 Channel) |       | Spermine (mM) |       |       |       |       |       |
|----------------------|-------|---------------|-------|-------|-------|-------|-------|
|                      |       | 1.25          | 1.00  | 0.75  | 0.50  | 0.25  | 0.00  |
| TEPA (%)             | 0.015 | 35935         | 51597 | 49758 | 49933 | 46394 | 38004 |
|                      | 0.010 | 47613         | 49941 | 51650 | 50738 | 45223 | 35856 |
|                      | 0.005 | 49703         | 50027 | 49996 | 50360 | 44989 | 32116 |
|                      | 0.000 | 47622         | 49419 | 48057 | 47849 | 44127 | 17263 |

| Signal (655 Channel) |       | Spermine (mM) |       |       |       |       |       |
|----------------------|-------|---------------|-------|-------|-------|-------|-------|
|                      |       | 1.25          | 1.00  | 0.75  | 0.50  | 0.25  | 0.00  |
| TEPA (%)             | 0.015 | 25332         | 41804 | 41913 | 45707 | 42077 | 34689 |
|                      | 0.010 | 37802         | 39647 | 45011 | 44698 | 41548 | 34848 |
|                      | 0.005 | 36998         | 38854 | 42058 | 45139 | 41949 | 31980 |
|                      | 0.000 | 35076         | 39767 | 39753 | 40239 | 44904 | 21554 |

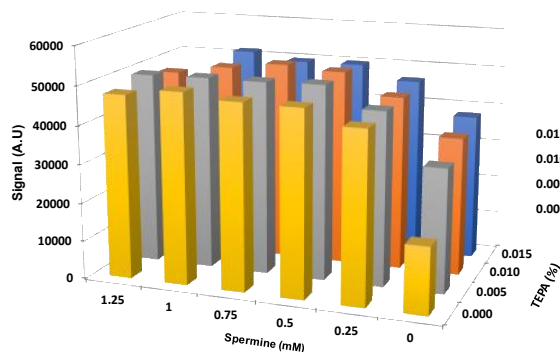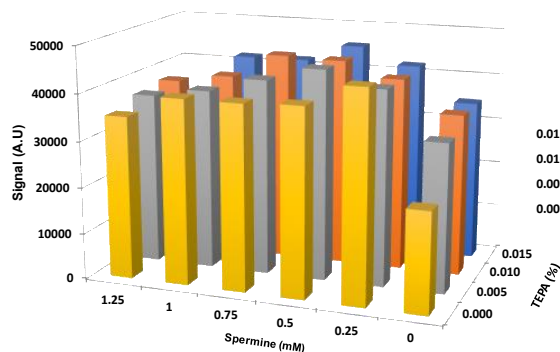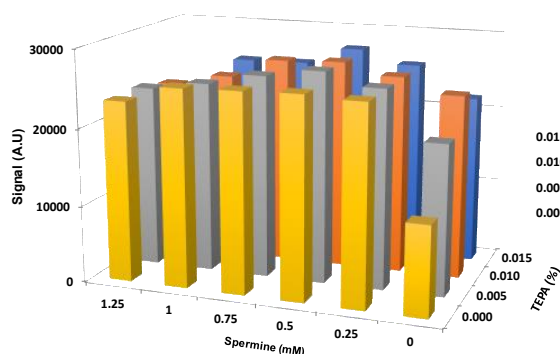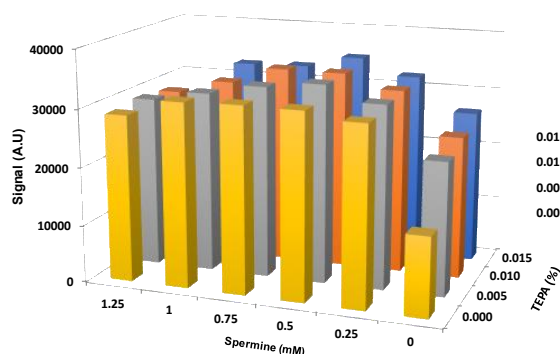

| Signal (594 Channel) |       | Spermine (mM) |       |       |       |       |       |
|----------------------|-------|---------------|-------|-------|-------|-------|-------|
|                      |       | 1.25          | 1.00  | 0.75  | 0.50  | 0.25  | 0.00  |
| TEPA (%)             | 0.015 | 15544         | 25082 | 25184 | 27438 | 25763 | 21849 |
|                      | 0.010 | 22666         | 24181 | 26772 | 27041 | 25632 | 23752 |
|                      | 0.005 | 23518         | 24628 | 26142 | 27229 | 25623 | 19436 |
|                      | 0.000 | 23349         | 25507 | 25703 | 25898 | 25571 | 11620 |

| Signal (532 Channel) |       | Spermine (mM) |       |       |       |       |       |
|----------------------|-------|---------------|-------|-------|-------|-------|-------|
|                      |       | 1.25          | 1.00  | 0.75  | 0.50  | 0.25  | 0.00  |
| TEPA (%)             | 0.015 | 20818         | 32735 | 32971 | 35032 | 32277 | 26530 |
|                      | 0.010 | 28802         | 31229 | 34172 | 34139 | 31838 | 24588 |
|                      | 0.005 | 29433         | 31177 | 33034 | 34133 | 31567 | 22991 |
|                      | 0.000 | 28806         | 31744 | 32017 | 31942 | 30738 | 13648 |

**Supplementary Figure 5:** Cross-Titration of Spermine vs. TEPA, using 2 mM Spermidine. Spermine was titrated from 0 to 1.25 mM, while TEPA was titrated from 0 – 0.015 % using the four color standard reaction with 0 and 25 pM dNTPs. The fluorescent signal (25 pM dNTPs– 0 pM dNTPs) for the four colors is shown within the tables and plotted; 700 nm (top left), 655 nm (top right), 594 nm (bottom left) and 532 nm (bottom right).

Cross-titrations of Spermine vs. TEPA were performed at fixed concentrations of spermidine (Supplementary Figures 3, 4 & 5). From this data 1 mM spermine, 1 mM spermidine and 0.015% TEPA were used as the final additive concentration in the four color detection reaction.



## Screening of Capture Polymerase and Ligation Enzyme

The choice of capture polymerase was based on initial screenings using a variety of commercially available DNA polymerases. In these reactions, the other enzymes were the same as described earlier, i.e., *E. coli* DNA ligase and *PfuUltra II Fusion HS* DNA polymerase. The tables and graphs below show the fluorescence intensity after 100 minutes of incubation. Note that conditions were not yet fully optimized for capture and ligation, giving results that differ from those in reactions performed under finalized conditions.

The choice of ligase was based on initial screenings using a variety of commercially available DNA ligases. In these reactions, the other enzymes were the same as described earlier, i.e., *Bst L.F.* DNA polymerase and *PfuUltra II Fusion HS* DNA polymerase. The tables and graphs below show the fluorescence intensity after 100 minutes of incubation. Note that conditions were not yet fully optimized for capture and ligation, giving results that differ from those in reactions performed under finalized conditions.

As before, “captured” refers to a construct of CAP+N (simulating that capture has taken place), and “target” refers to a construct of CAP+N+LIG (simulating that both capture and ligation have taken place).

### a. Screening of Capture Polymerase – Part 1

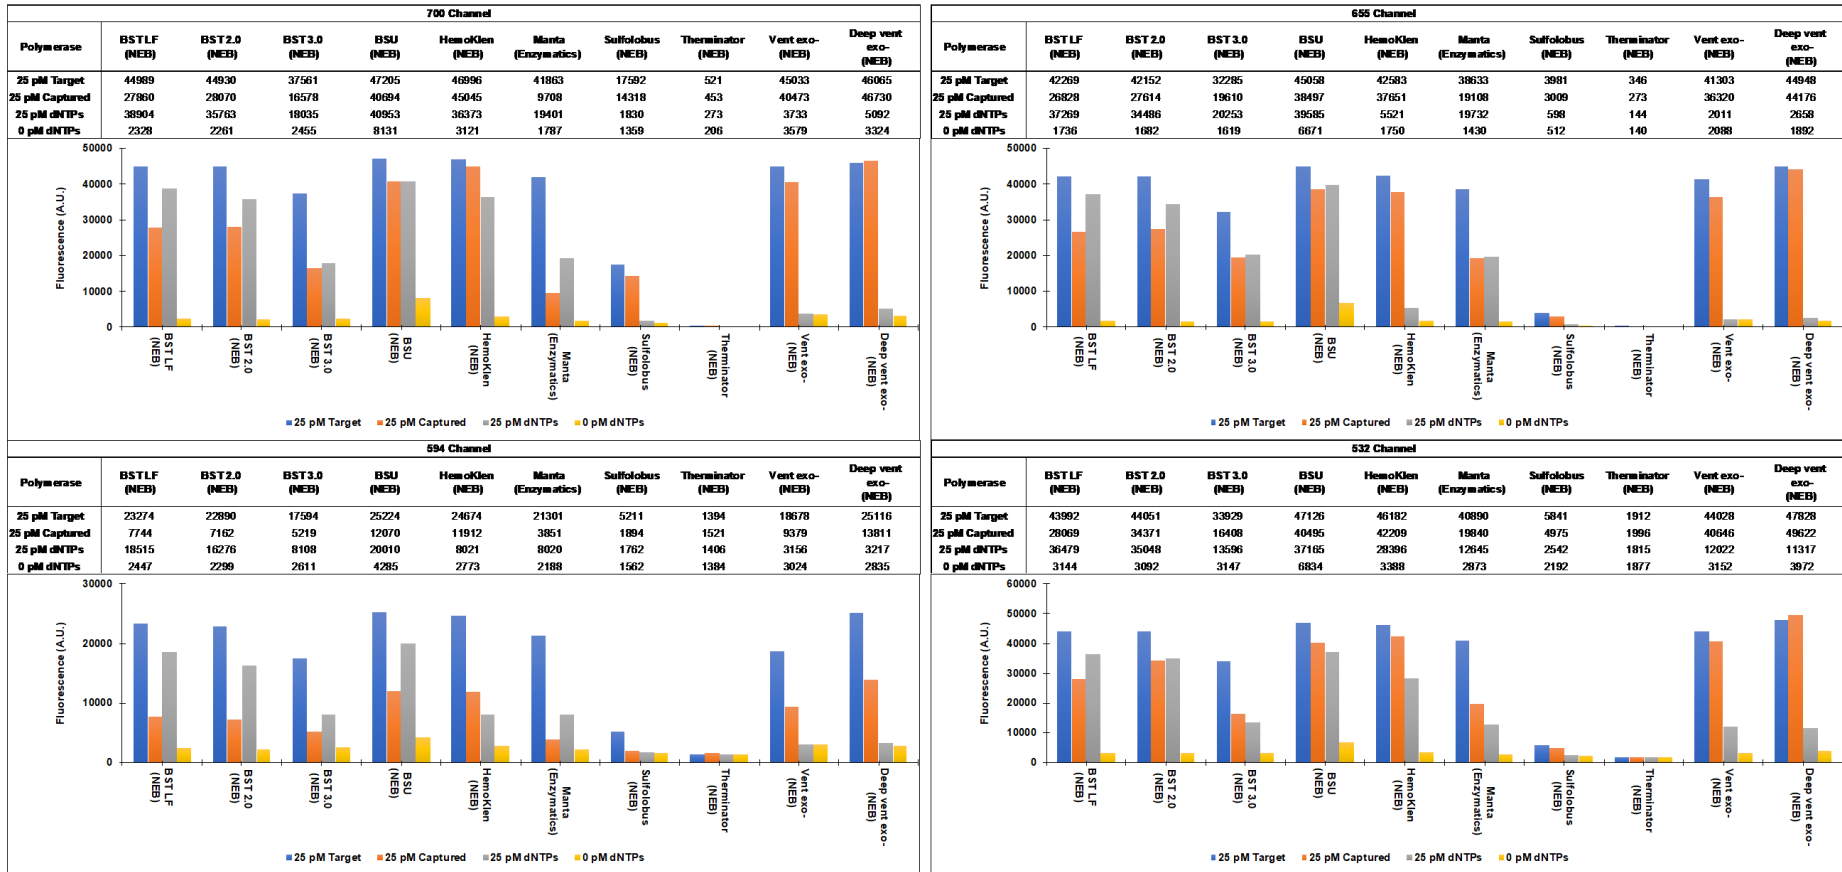

**Supplementary Figure 6:** Screening of capture polymerase – Part 1. Different polymerases (from different suppliers) were used to test their ability to capture dNTPs at 25 pM, using the four color standard reaction, compared to 25 pM Captured and 25 pM Target oligos. The four colors are shown in the tables and plotted; 700 nm (top left), 655 nm (top right), 594 nm (bottom left) and 532 nm (bottom right).

## b. Screening of Capture Polymerase – Part 2

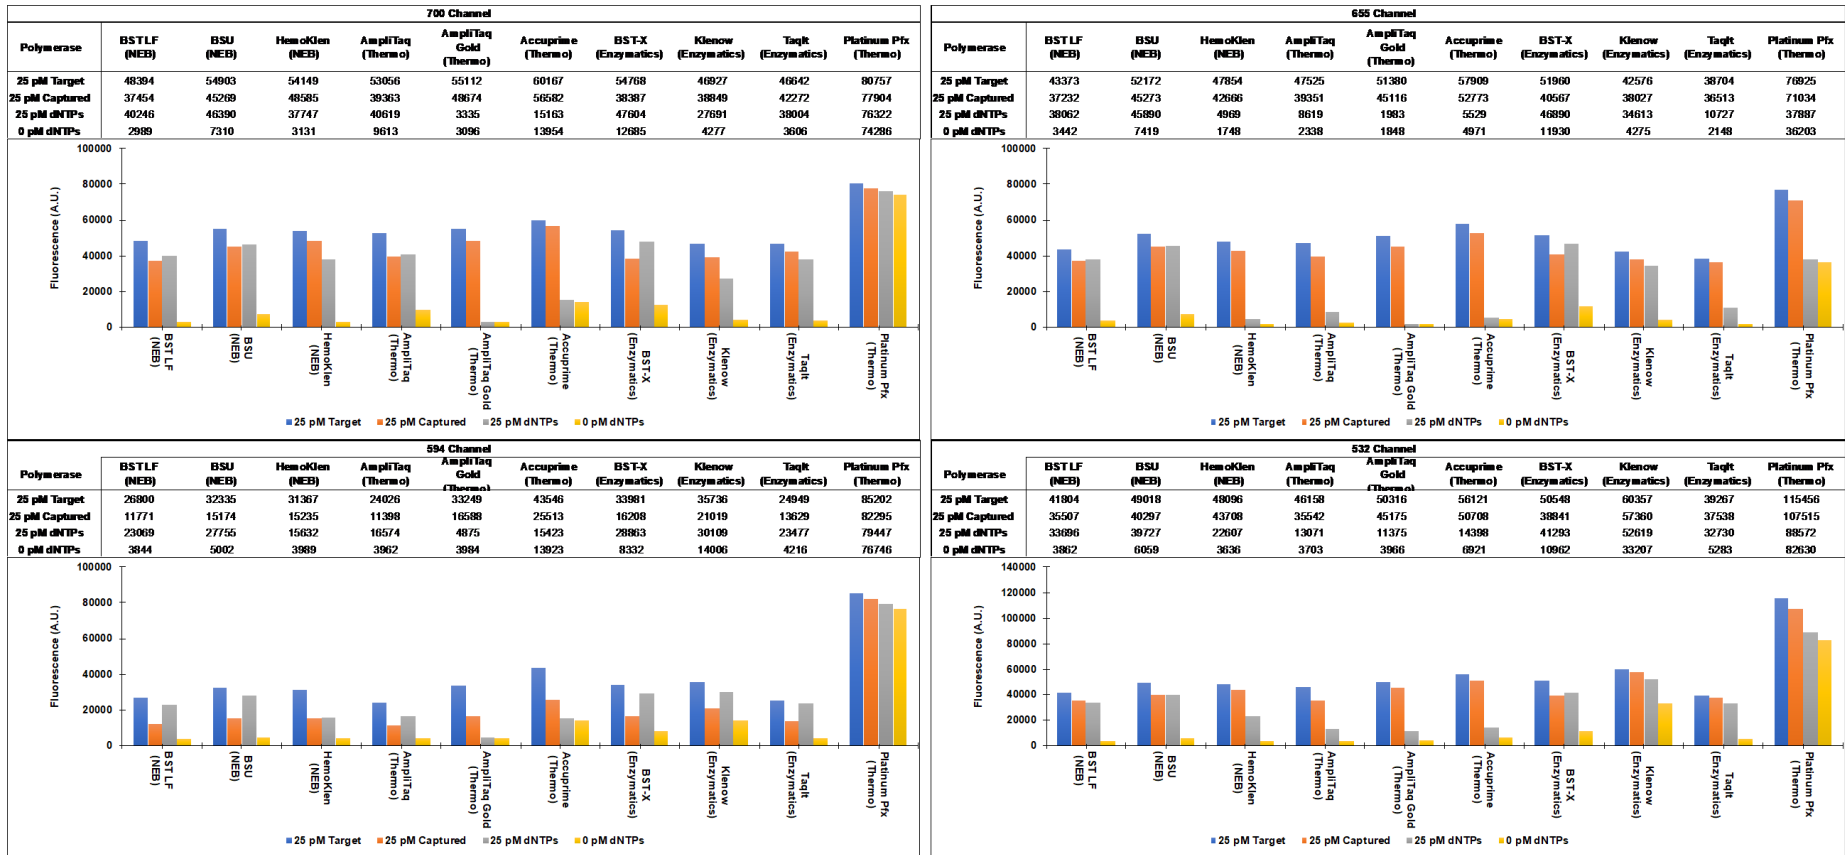

**Supplementary Figure 7:** Screening of capture polymerase – Part 2. Different polymerases (from different suppliers) were used to test their ability to capture dNTPs at 25 pM, using the four color standard reaction, compared to 25 pM Captured and 25 pM Target oligos. The four colors are shown in the tables and plotted; 700 nm (top left), 655 nm (top right), 594 nm (bottom left) and 532 nm (bottom right).

### c. Screening of Ligation Enzyme

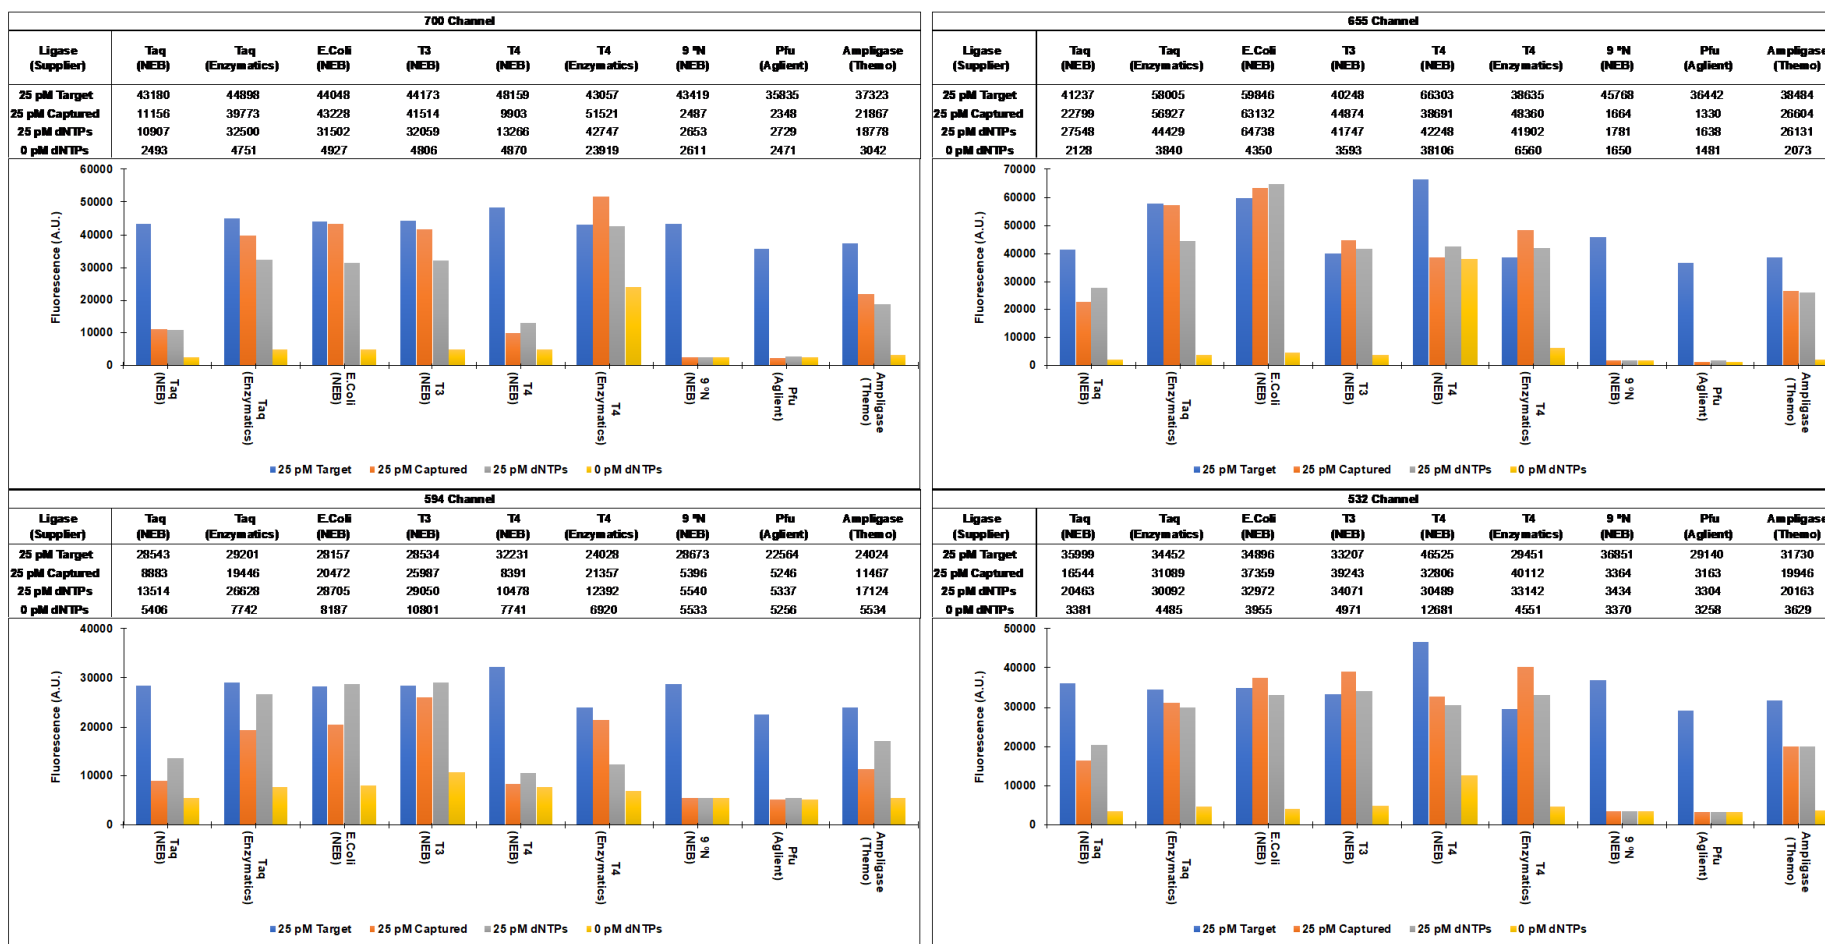

**Supplementary Figure 8:** Screening of Ligation Enzyme. Different Ligases (from different suppliers) were used to test their ability to capture dNTPs at 25 pM, using the four color standard reaction, compared to 25 pM Captured and 25 pM Target oligos. For the four colors the data from 0 pM dNTPs, 25 pM dNTPs, 25 pM Captured and 25 pM Targets are shown in the tables and plotted; 700 nm (top left), 655 nm (top right), 594 nm (bottom left) and 532 nm (bottom right).

## Digestion of oligo mix using the exonuclease activity of different polymerases

Finding a suitable exonuclease proved the most difficult among the enzymes needed in our reaction cascade. “Classical” exonucleases (Exonuclease T, Exonuclease I, Lambda Exonuclease) all lacked sufficient dsDNA selectivity for our intended purpose, resulting in unwanted digestion of Probe Oligo even in absence of dNTPs. Most polymerases with 3' -> 5' exonuclease activity were either insufficiently selective as well, or their exonuclease activity was too slow to result in sufficient signal being generated. The three polymerases that exhibited suitable levels of selectivity and reactivity were Phusion II DNA polymerase, Phire Hot Start II DNA Polymerase and *Pfu*Ultra II Fusion HS DNA polymerase. All three polymerases required different buffer systems and reaction temperatures for optimal reactivity (Supplementary Table 9):

### a. Polymerase - Required Buffers and Temperatures

**Supplementary Table 9:** Description of the three Polymerase buffer conditions used.

| 1x Buffer Component |                               |            |                    |
|---------------------|-------------------------------|------------|--------------------|
| Polymerase          | <i>Pfu</i> Ultra II Fusion HS | Phusion II | Phire Hot Start II |
| pH                  | 7.6                           | 8.0        | 8.0                |
| Tris-HCl            | 12 mM                         | 40mM       | 5 mM               |
| MgCl <sub>2</sub>   | 5 mM                          | 15mM       | 15 mM              |
| KCl                 | 20 mM                         | 100mM      | 60 mM              |
| Triton X-100        | 0.10 %                        | 0.10%      | 0.10%              |
| DTT                 | 0.5 mM                        | 0.5 mM     | 0.5 mM             |
| NAD                 | 400 nM                        | 400 nM     | 400 nM             |
| Temperature         | 69.5 °C                       | 68.5 °C    | 69.0 °C            |

## b. Screening of different Polymerases

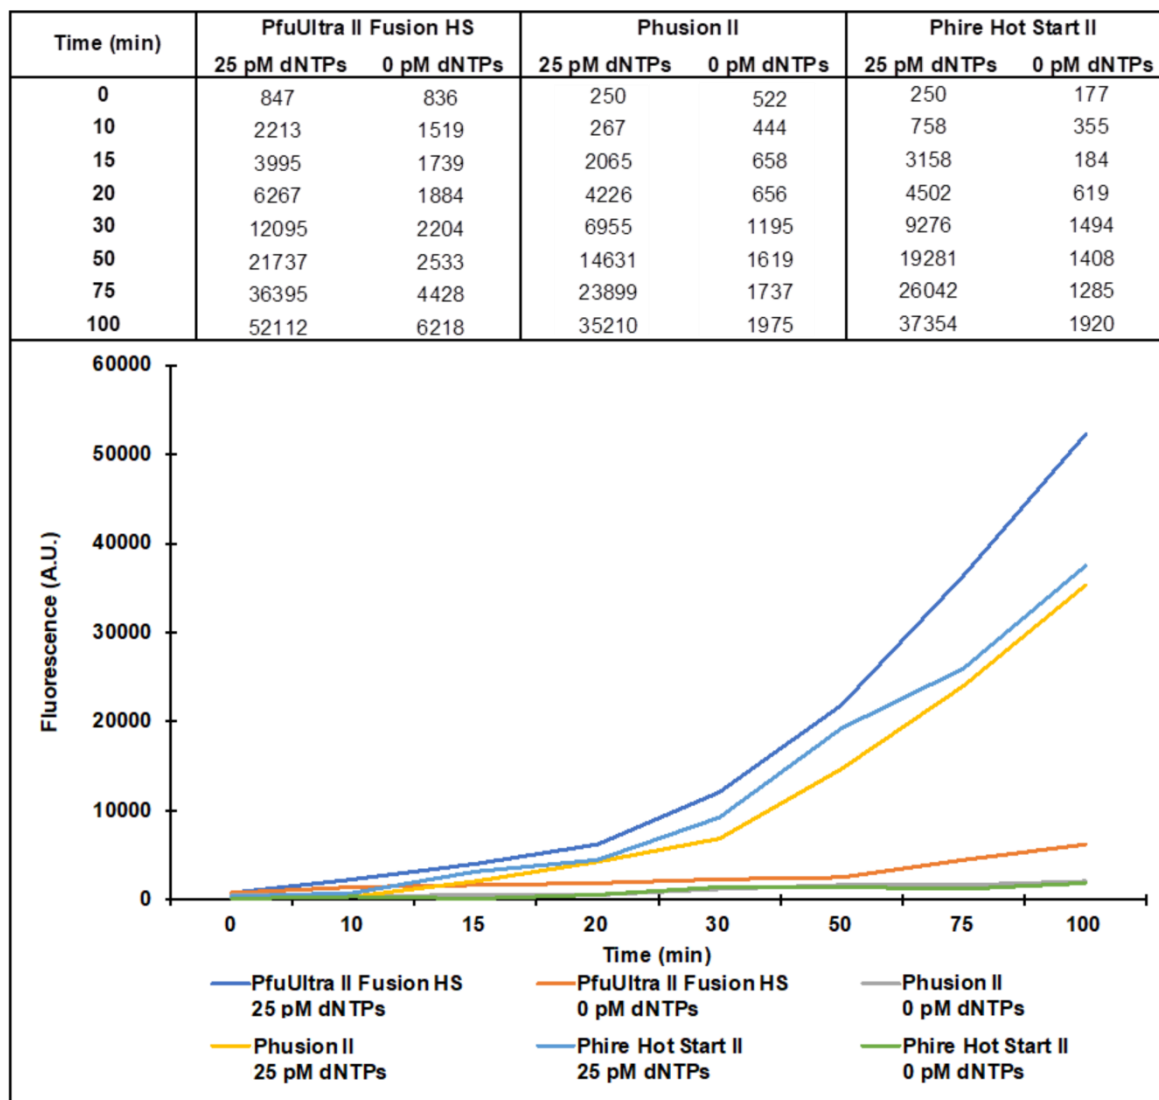

**Supplementary Figure 9:** Screening of different Polymerases. Different Polymerases were tested for their ability to digest the probe DNA, using the four color standard reaction, at 0 pM and 25 pM dNTPs concentration (data from the 655 nm channel is shown).

### c. Digestion temperature for *PfuUltra II* Fusion HS DNA polymerase

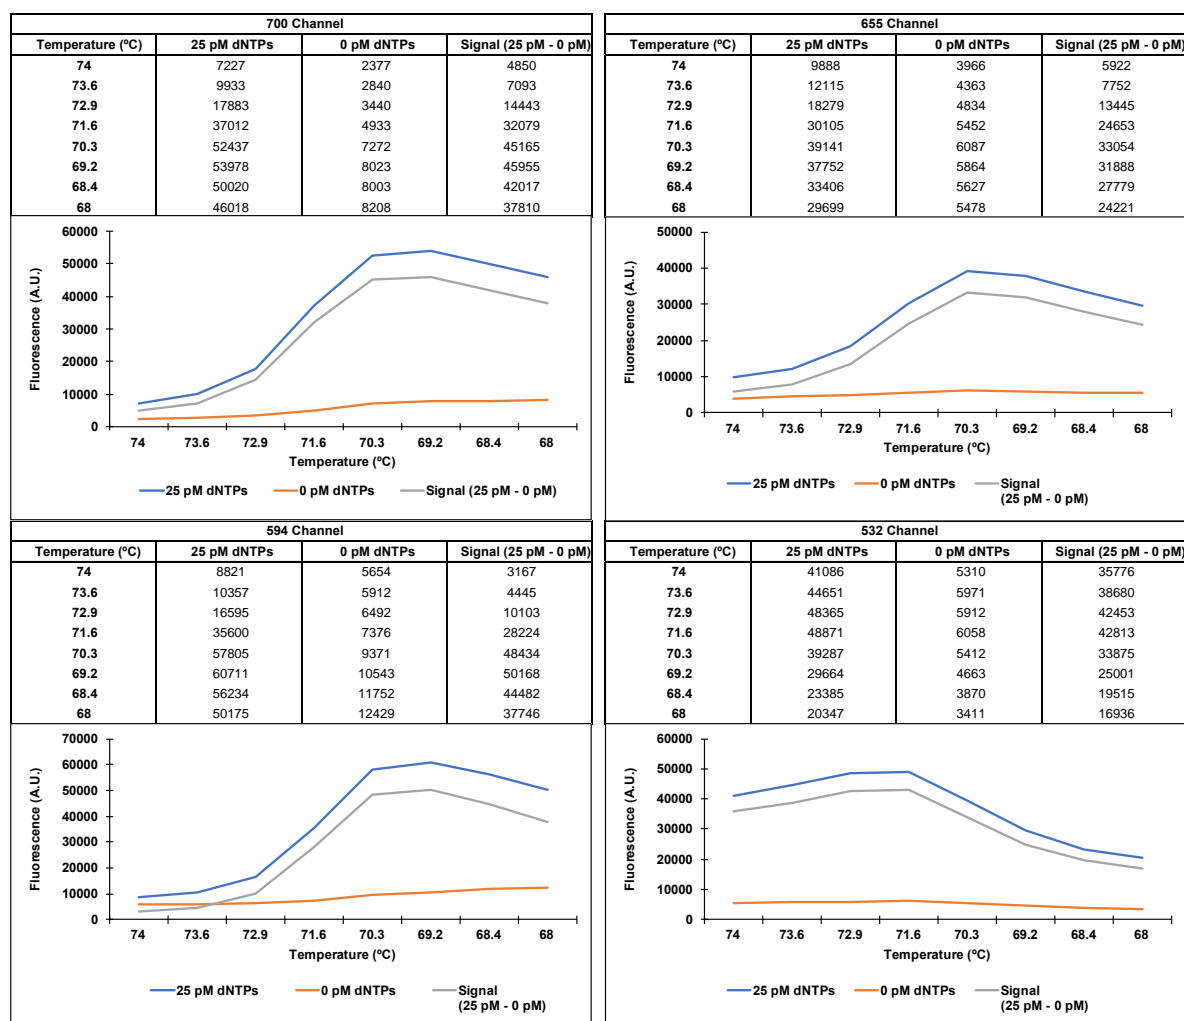

**Supplementary Figure 10:** Screening of digestion temperature for *PfuUltra II* Fusion HS DNA polymerase. *PfuUltra II* Fusion HS DNA polymerase was screened from 60 to 74 °C for its ability to digest the probe DNA, using the four color standard reaction, at 0 and 25 pM dNTPs concentration. For the four colors the data from 0 pM and 25 pM dNTPs as well as the signal (0 pM – 25 pM) is shown within the tables and plotted; 700 nm (top left), 655nm (top right), 594 nm (bottom left) and 532 nm (bottom right).

## Choice of Protecting Group on LIG

In order to protect the oligos from unwanted exonuclease digestion, a protecting group was needed at the 3'-end of LIG. Several commercially available end modifications were tested for their suitability by subjecting the corresponding 3'-modified LIG oligos to an excess of *PfuUltra II Fusion HS* DNA polymerase during a 2-hour incubation at 70°C. The figure below shows a picture of the resulting 8% denaturing PAGE analysis of the reactions.

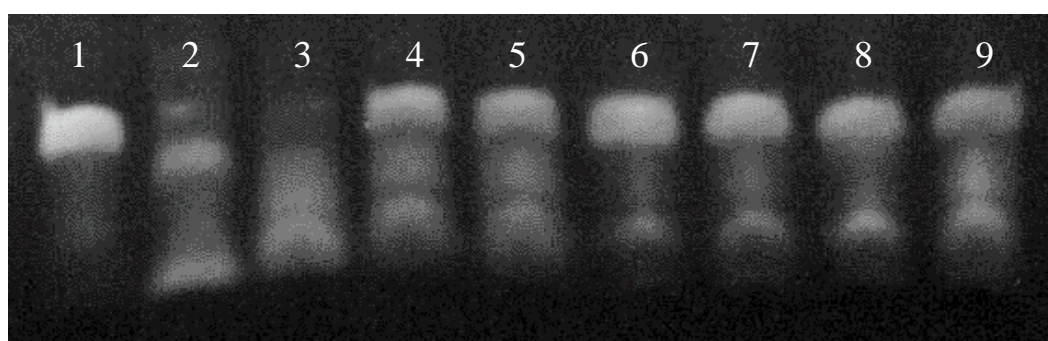

| Lane number | End modification                   |
|-------------|------------------------------------|
| 1           | (none), unreacted reference sample |
| 2           | (none)                             |
| 3           | RNA base (Uracil)                  |
| 4           | Phosphorothioate                   |
| 5           | Hexanediol                         |
| 6           | 5'-3' inverted dT                  |
| 7           | Spacer 9                           |
| 8           | C3 spacer                          |
| 9           | dspacer (abasic furan)             |

**Supplementary Figure 11:** Image (detail) of 8% denaturing (formamide) polyacrylamide gel showing the digestion of LIG by *PfuUltra II Fusion HS* bearing a variety of 3' end modifications.

It is apparent that unprotected oligos are digested almost completely under these conditions, and that the RNA base offers no protection. The most efficient protecting group is the 5'-3' inverted dT, which was consequently used for our experiments.



## Specificity of Detection

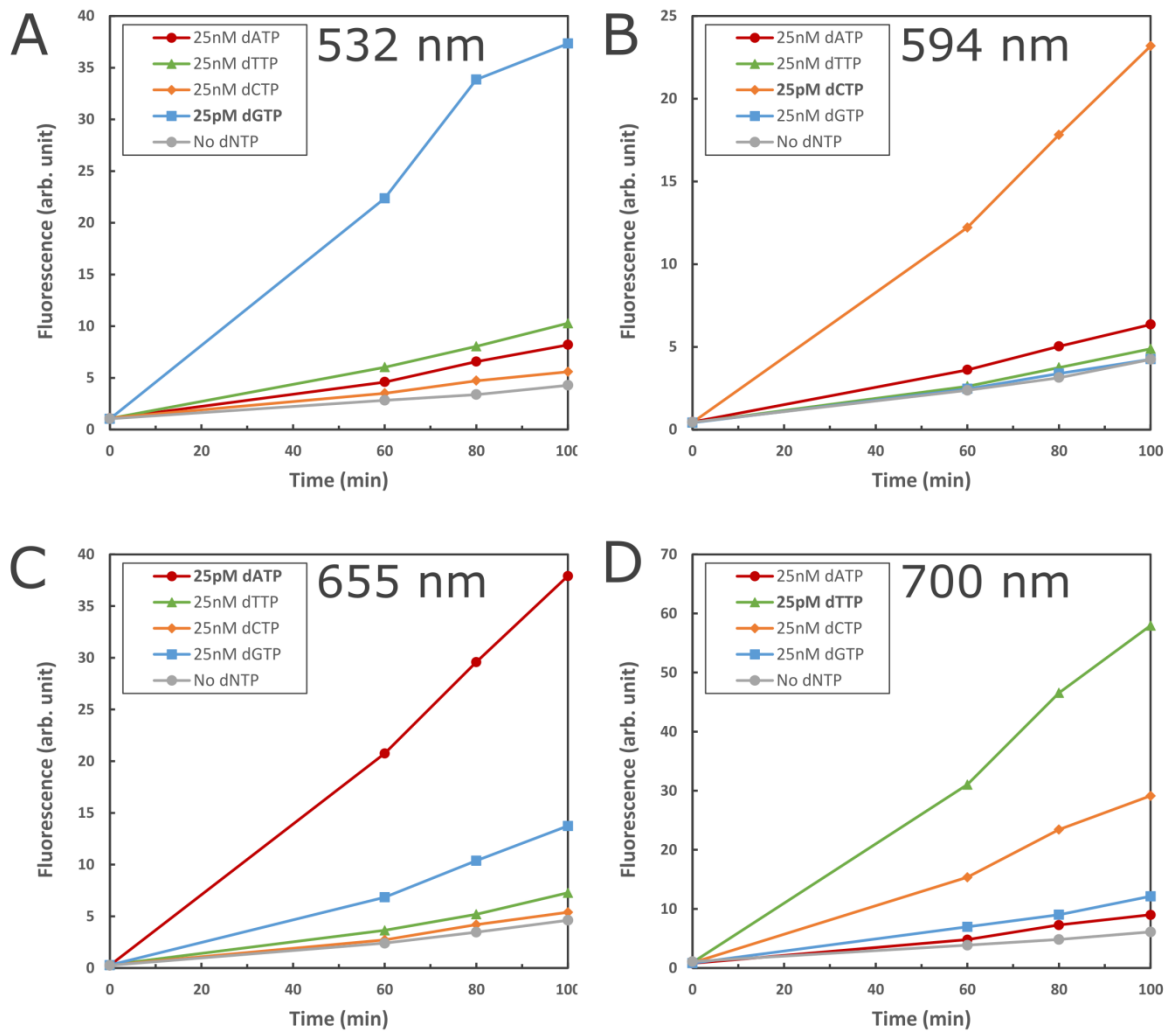

**Supplementary Figure 12:** Testing for chemical cross-talk by adding either intended or “incorrect” dNTP to the reaction. The individual capture channels were tested separately (A – Probe, LIG and CAP for dGTP detection only, B – Probe, LIG and CAP for dCTP detection only, C – Probe, LIG and CAP for dATP detection only, D – Probe, LIG and CAP for dTTP detection only). Note that in each case the intended dNTP is present at 1000-fold lower concentration than the three others.

## Fluorescence Measurements of Droplets

Fluorescent images of microdroplets were acquired using a custom fluorescent microscope consisting of an Andor Zyla 5.5 sCMOS camera, four CW laser excitation lines (Vortran Stradus 532 nm, Cobalt Mambo 594 nm, Vortran Stradus 640 nm, Vortran Stradus 701 nm), a filter cube changer to select the appropriate excitation, dichroic and emission filters (see Supplementary Table 10), and a galvanometer scanning mirror system to raster the laser over the area of interest. The exposure time per laser for each 300  $\mu\text{m}$  x 300  $\mu\text{m}$  field of view was 30 s.

**Supplementary Table 10:** Filter sets used for fluorescence measurements of droplets

| <b>Laser Wavelength</b> | <b>Excitation filter</b> | <b>Dichroic</b>      | <b>Emission filter</b>                  |
|-------------------------|--------------------------|----------------------|-----------------------------------------|
| 701 nm                  | Semrock<br>FF01-692/40   | Chroma<br>725dcxxr   | Semrock<br>FF01-795/150                 |
| 640 nm                  | Semrock<br>FF01-640/14   | Semrock<br>Di02-R635 | Semrock<br>FF01-679/41                  |
| 594 nm                  | Semrock<br>FF01-591/6    | Semrock<br>Di02-R594 | Semrock<br>FF01-647/57                  |
| 532 nm                  | Semrock<br>FF01-532/3    | Semrock<br>Di02-R532 | Semrock<br>FF01-582/75<br>+ FF01-562/40 |

**A. Example Images – All Color Channels**

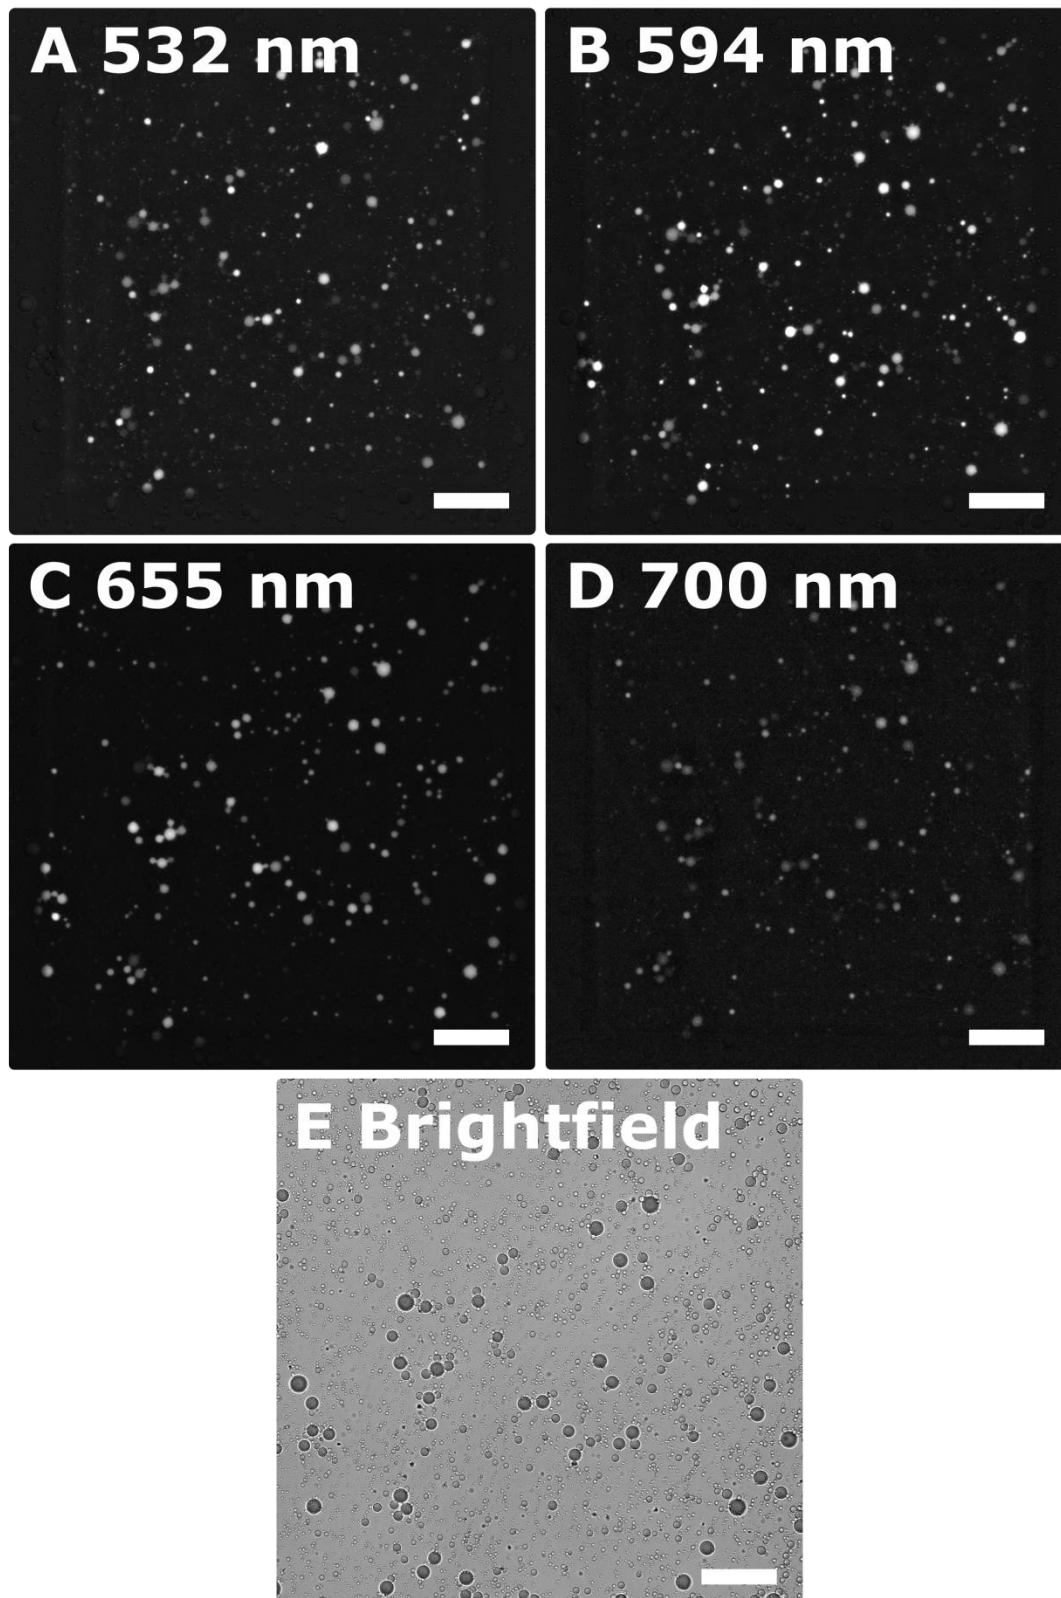

**Supplementary Figure 13:** Example images of a field of view of droplets in: A-D) the four color channels used for dNTP detection, and E) brightfield used for droplet position and size detection. Scale bars are 50  $\mu\text{m}$ .

## B. Fluorescence Intensity vs. Droplet Diameter – All Color Channels

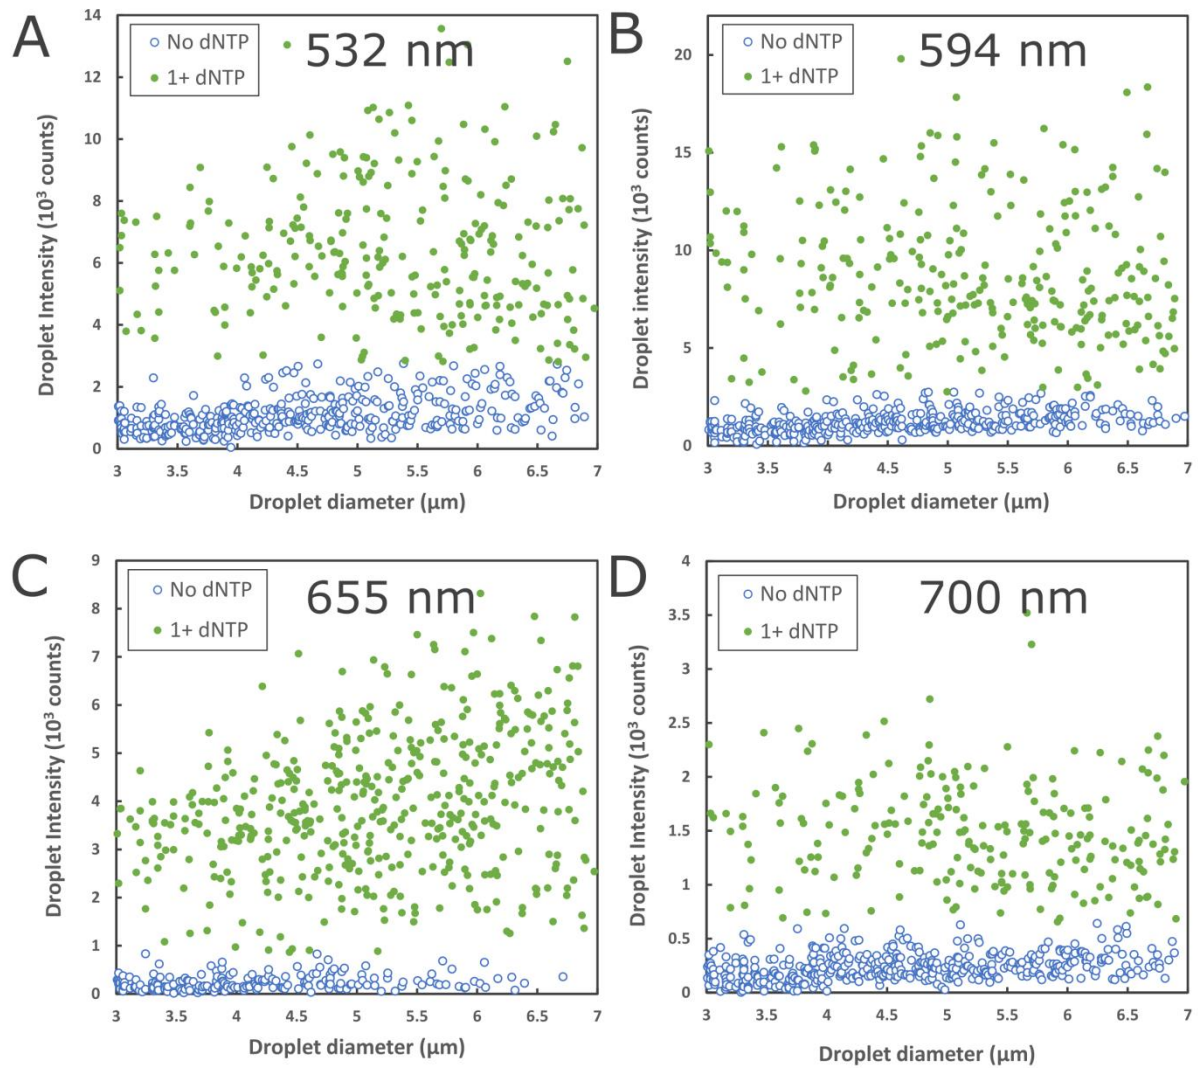

**Supplementary Figure 14:** Droplet intensity vs. droplet diameter extracted from each of the four fluorescence channels: A) 532 nm, B) 594 nm, C) 655 nm, D) 700 nm.

### C. Fluorescence Intensity histograms – All Color Channels

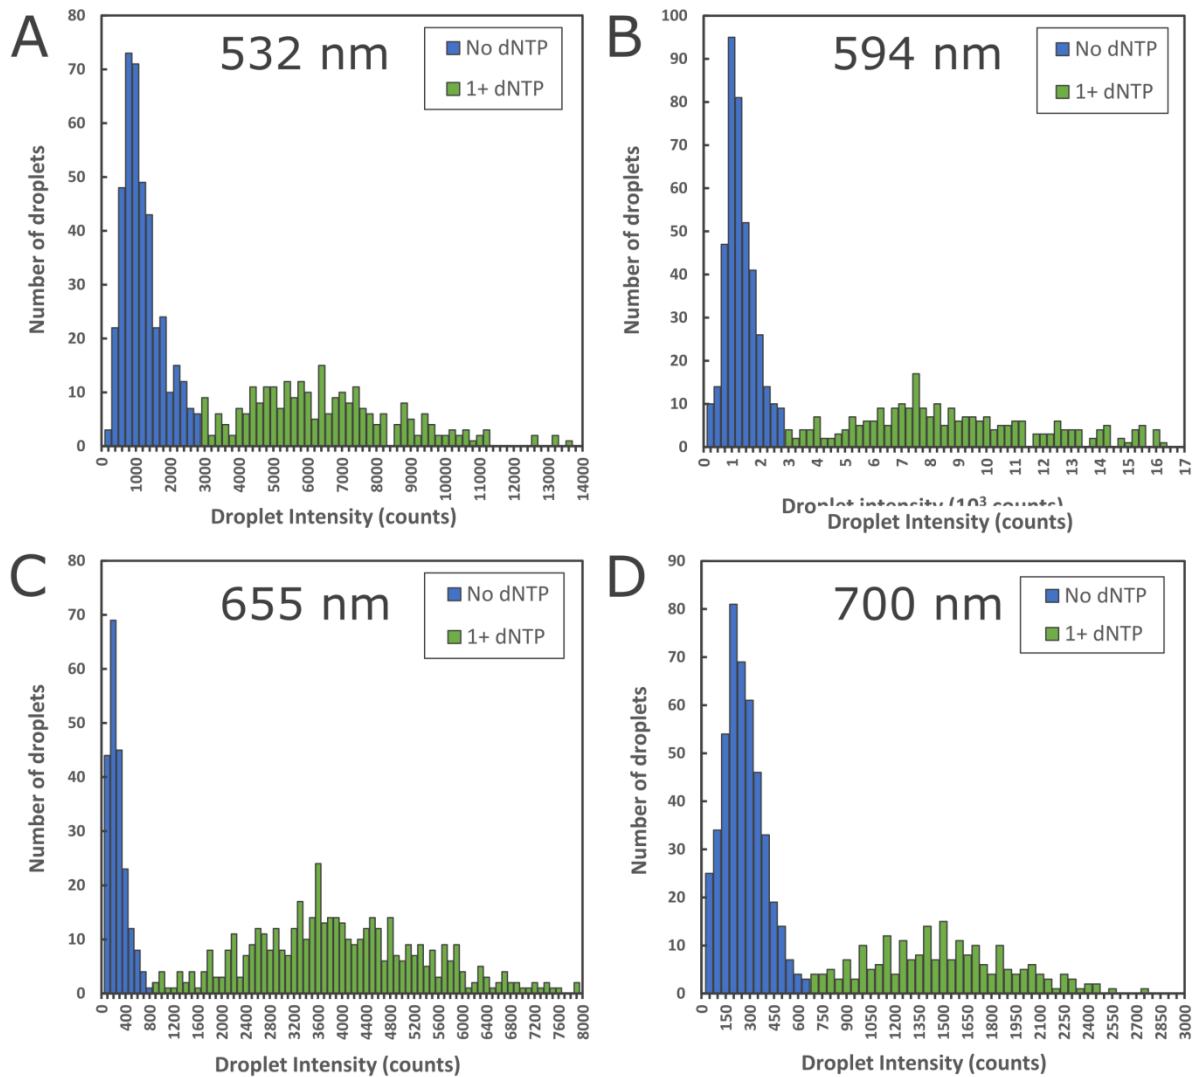

**Supplementary Figure 15:** Histograms showing frequency of occurrence vs droplet intensity for all four color channels (A 532 nm, B 594 nm, C 655 nm, D 700 nm) in the 3-7  $\mu\text{m}$  diameter range. In each case, two peaks are visible, one for droplets which contain no nucleotide (blue) and one for droplets which contain one (or more) nucleotides (green).

## D. Fluorescence Intensity – Channel Correlations (3 - 7 micrometer diameters)

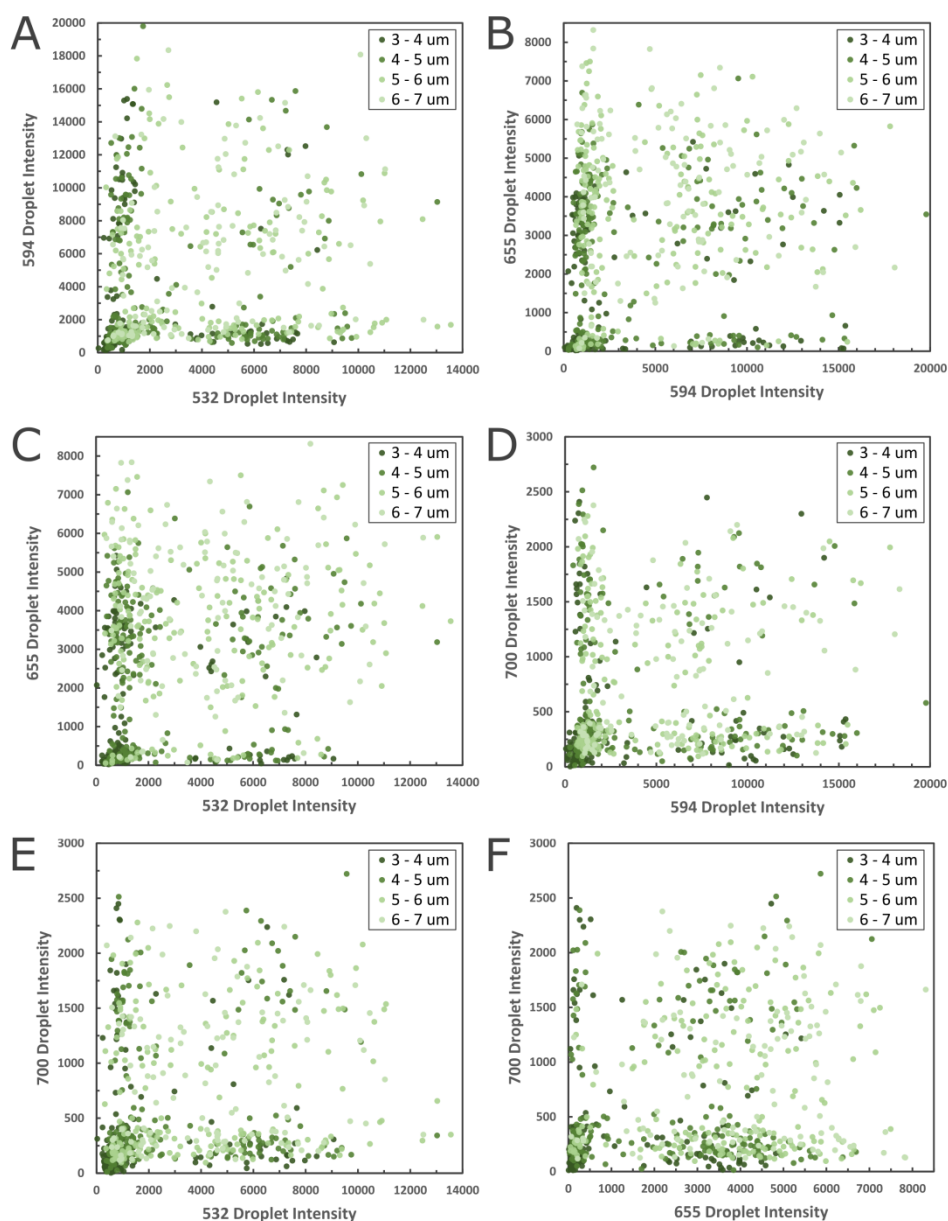

**Supplementary Figure 16:** Droplet intensity in a given color channel plotted against droplet intensity in another channel. All six of the possible pairs are shown: A) 532 nm vs. 594 nm, B) 594 nm vs. 655 nm, C) 532 nm vs. 655 nm, D) 594 nm vs. 700 nm, E) 532 nm vs. 700 nm, F) 655 nm vs. 700 nm. These plots allow for a visual examination of the correlation between color channels. The different diameter subsets are colored from dark green at small droplets to light green at larger droplets.

For higher dNTP concentration or larger droplets a fraction of the droplets will begin to appear on the diagonal as the probability of a droplet containing more than one type of dNTP becomes larger. For instance, 12.5 pM of each dNTP in 5 μm droplets gives  $P(\geq 1)_{532}P(\geq 1)_{594} \approx 15\%$ .

## E. Fluorescence Intensity – Channel Correlations (3 - 4 micrometer diameters)

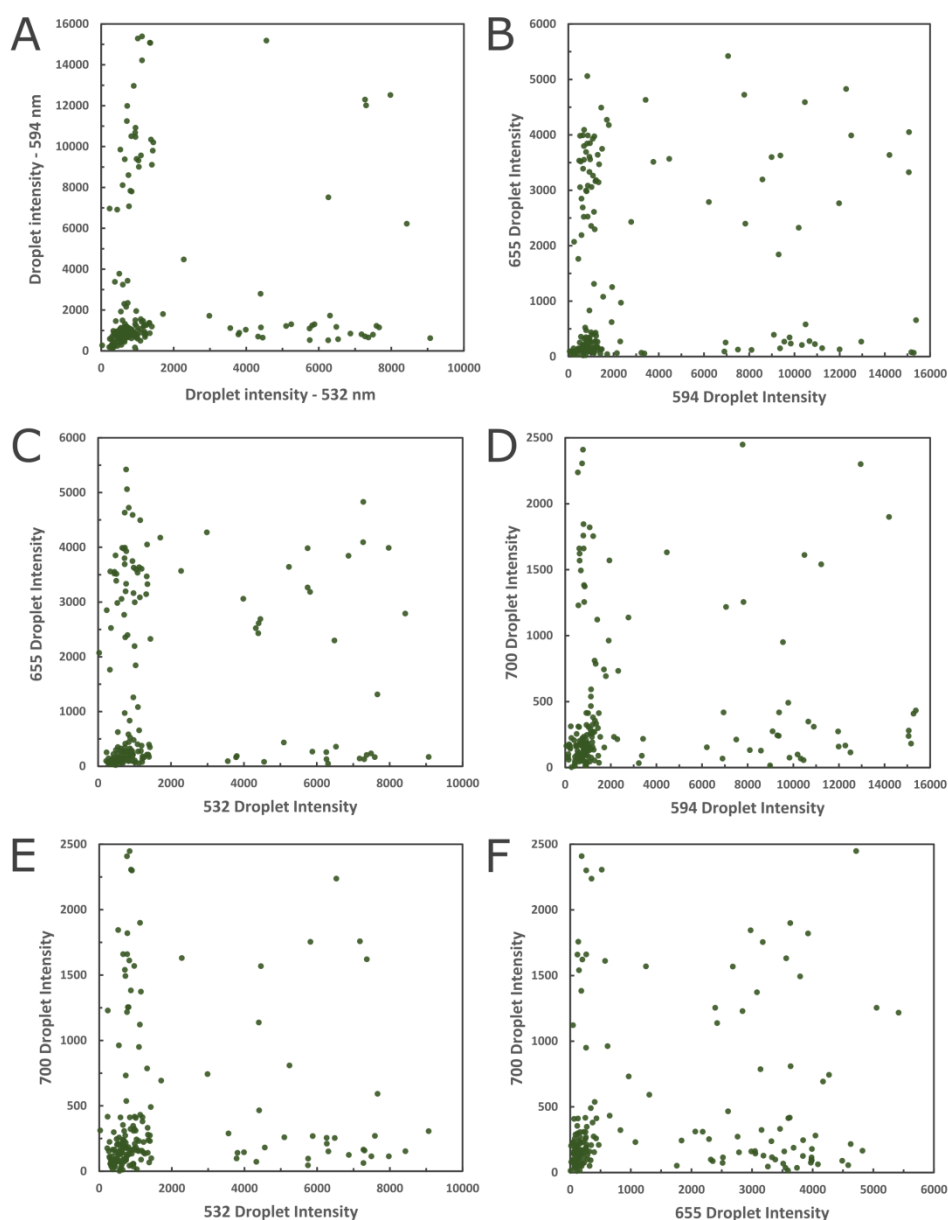

**Supplementary Figure 17:** Droplet intensity in a given color channel plotted against droplet intensity in another channel. All six of the possible pairs are shown: A) 532 nm vs. 594 nm, B) 594 nm vs. 655 nm, C) 532 nm vs. 655 nm, D) 594 nm vs. 700 nm, E) 532 nm vs. 700 nm, F) 655 nm vs. 700 nm. These plots allow for a visual examination of the correlation between color channels. Only the 3-4  $\mu\text{m}$  subset of the droplets is shown in each case. The Pearson correlation coefficient (and  $r^2$  value) for sub-figures A - F are 0.072 (0.005), 0.149 (0.022), 0.135 (0.018), 0.124 (0.015), 0.090 (0.008), and 0.157 (0.025) respectively.

Supplementary Figure 17 shows the 3 - 4  $\mu\text{m}$  diameter droplet range. As an example, consider the following. From Table 1 in the manuscript, the expected fraction of droplets with

signal for 12.5 pM at 3  $\mu\text{m}$  and 4  $\mu\text{m}$  diameter is 10% and 22% respectively. For two colours to be positive, this implies between 1% (if all droplets are 3  $\mu\text{m}$ ) and 4.8% (if all droplets are 4  $\mu\text{m}$ ). We see between 3.4% and 5.0% for the combinations of colours (532 nm, 594 nm and 700 nm) which have 12.5 pM dNTP concentration, which is close to the expected range. The 655 nm channel has 37.5 pM dNTP concentration so a higher fraction would be expected. At 3  $\mu\text{m}$  diameter we expect 28% positive, at 4  $\mu\text{m}$  53% positive, which then gives a 2.8% to 11.7% range for double positive between the 12.5pM and 37.5pM channels. We observe 9.5% to 10.6%, again within expected bounds.

## Droplet Finding Algorithm

First the gradient of the brightfield droplet image is taken to get the directional change in the intensity of the image. The circle finding algorithm is based on performing a matched filter(5). This involves correlating a known template image with the gradient image of interest. In this case the template is a mathematically-defined ring,  $\exp \frac{-(r-r_0)^2}{w^2}$ , with direction pointing radially outwards, where  $r$  is distance from the droplet's centre,  $r_0$  is the template's size parameter, and  $w$  is the template's width parameter. This is performed multiple times, with a range of template image sizes,  $r_0$ , to allow a range of droplet sizes to be found. Suitable thresholds are chosen such that droplets are identified and spurious matches are minimised.

## References

1. Brelje, T.C., Wessendorf, M.W. and Sorenson, R.L. (1993) Chapter 4. Multicolor Laser Scanning Confocal Immunofluorescence Microscopy: Practical Application and Limitations. *Methods Cell Biol.*, **38**, 97–181.
2. Lundquist, P.M., Zhong, C.F., Zhao, P., Tomaney, A.B., Peluso, P.S., Dixon, J., Bettman, B., Lacroix, Y., Kwo, D.P., McCullough, E., *et al.* (2008) Parallel confocal detection of single molecules in real time. *Opt. Lett.*, **33**, 1026–1028.
3. Fischer, M.J.E. (2010) Amine Coupling Through EDC/NHS: A Practical Approach. In *Surface Plasmon Resonance. Methods in Molecular Biology*. pp. 55–73.
4. Forster, T. (1948) Zwischenmolekulare Energiewanderung und Fluoreszenz. *Naturwissenschaften*, **33**, 166–175.
5. Turin, G.L. (1960) An Introduction to Matched Filters. *IRE Trans. Inf. Theory*, **6**, 311–329.
